# Supplementary material for: Undisclosed financial ties between guideline writers and pharmaceutical companies: a cross-sectional study across 10 disease categories
Source: PubMed Central journal article supplement — BMJ Open. 2019 Feb 5;9(2):e025864. doi: 10.1136/bmjopen-2018-025864 (PMC6377504; doi:10.1136/bmjopen-2018-025864), 2019-02-05
Supplement: bmjopen-2018-025864.draft_revisions.pdf [file bmjopen-2018-025864.draft_revisions.pdf]

# BMJ Open

BMJ Open is committed to open peer review. As part of this commitment we make the peer review history of every article we publish publicly available.

When an article is published we post the peer reviewers' comments and the authors' responses online. We also post the versions of the paper that were used during peer review. These are the versions that the peer review comments apply to.

The versions of the paper that follow are the versions that were submitted during the peer review process. They are not the versions of record or the final published versions. They should not be cited or distributed as the published version of this manuscript.

BMJ Open is an open access journal and the full, final, typeset and author-corrected version of record of the manuscript is available on our site with no access controls, subscription charges or pay-per-view fees (<http://bmjopen.bmj.com>).

If you have any questions on BMJ Open's open peer review process please email [info.bmjopen@bmj.com](mailto:info.bmjopen@bmj.com)

# BMJ Open

## Undisclosed financial ties between guideline writers and pharmaceutical companies: a cross-sectional study across ten disease categories

|                               |                                                                                                                                                                                                                                                                                                                                                                                                                                                                      |
|-------------------------------|----------------------------------------------------------------------------------------------------------------------------------------------------------------------------------------------------------------------------------------------------------------------------------------------------------------------------------------------------------------------------------------------------------------------------------------------------------------------|
| Journal:                      | <i>BMJ Open</i>                                                                                                                                                                                                                                                                                                                                                                                                                                                      |
| Manuscript ID                 | bmjopen-2018-025864                                                                                                                                                                                                                                                                                                                                                                                                                                                  |
| Article Type:                 | Research                                                                                                                                                                                                                                                                                                                                                                                                                                                             |
| Date Submitted by the Author: | 07-Aug-2018                                                                                                                                                                                                                                                                                                                                                                                                                                                          |
| Complete List of Authors:     | Moynihan, Ray; Bond University , CREBP<br>Lai, Alexandra; University of Sydney , Charles Perkins Centre<br>Jarvis, Huw; National Health and Medical Research Council<br>Duggan, Geraint; National Health and Medical Research Council<br>Goodrick, Stephanie; National Health and Medical Research Council<br>Beller, Elaine; Bond University, Centre for Research in Evidence Based Practice<br>Bero, Lisa; University of Sydney, Charles Perkins Centre / Pharmacy |
| Keywords:                     | Protocols & guidelines < HEALTH SERVICES ADMINISTRATION & MANAGEMENT, conflicts of interest, pharmaceutical industry                                                                                                                                                                                                                                                                                                                                                 |
|                               |                                                                                                                                                                                                                                                                                                                                                                                                                                                                      |

SCHOLARONE™  
Manuscripts

1  
2  
3  
4  
5  
6 **Title:** Undisclosed financial ties between guideline writers and pharmaceutical companies: a  
7 cross-sectional study across ten disease categories  
8  
9  
10

11 **Authors Names:** Ray Moynihan, Alexandra Lai, Huw Jarvis, Geraint Duggan, Stephanie  
12 Goodrick, Elaine Beller, Lisa Bero.  
13  
14  
15

16  
17 **Address for each author:**

18 Centre for Research in Evidence-Based Practice, Bond University, Gold Coast, QLD, 4229,  
19 Australia Ray Moynihan

20 Senior Research Fellow

21 Charles Perkins Centre and Faculty of Pharmacy, The University of Sydney, NSW, 2006,  
22 Australia Alexandra Lai

23 Honours Student

24 National Health and Medical Research Council, Canberra, ACT, 2601

25 Australia Huw Jarvis

26 Senior Project Officer

27 National Health and Medical Research Council, Canberra, ACT, 2601

28 Australia Geraint Duggan

29 Director, Clinical Guidelines

30 National Health and Medical Research Council, Canberra, ACT, 2601

31 Australia Stephanie Goodrick

32 Assistant Director, Clinical Guidelines

33 Centre for Research in Evidence-Based Practice, Bond University, Gold Coast, QLD, 4229,  
34 Australia Elaine M Beller

35 Associate Professor

36 Charles Perkins Centre and Faculty of Pharmacy, The University of Sydney, NSW, 2006,  
37 Australia Lisa Bero

38 Professor

39  
40  
41  
42  
43  
44  
45  
46  
47  
48  
49  
50

51 Correspondence to R Moynihan raymoynihan@bond.edu.au  
52  
53  
54  
55  
56  
57  
58  
59  
60

## Abstract

**Objectives:** To investigate the proportion of potentially relevant undisclosed financial ties between clinical practice guideline writers and pharmaceutical companies.

**Design:** Cross-sectional study of a stratified random sample of Australian guidelines and writers.

**Setting:** Guidelines available from Australia's National Health and Medical Research Council guideline database, 2012-2014, stratified across ten health priority areas.

**Population:** 402 authors of 33 guidelines, including up to 4 from each area, dependent on availability: arthritis/musculoskeletal(3); asthma(4); cancer(4); cardiovascular(4); diabetes (4); injury(3); kidney/urogenital(4), mental health(4); neurological(1); obesity(1). For guideline writers with no disclosures, or who disclosed no ties, a search of disclosures in the medical literature in the 5 years prior to guideline publication identified potentially relevant ties, undisclosed in guidelines. Guidelines were included if they contained recommendations of medicines, and writers included if developing or writing guidelines.

**Main outcome measures:** Proportions of guideline writers with potentially relevant undisclosed financial ties to pharmaceutical companies active in the therapeutic area; proportion of guidelines including at least one writer with a potentially relevant undisclosed tie.

**Results:** 344 of 402 writers (86%; 95% CI 82% to 89%) either had no published disclosures (228) or disclosed they had no ties (116). Of the 344 with no disclosed ties, 83 (24%; 95% CI, 20% to 29%) had potentially relevant undisclosed ties. Of 33 guidelines, 23 (70%; 95% CI, 51% to 84%) included at least one writer with a potentially relevant undisclosed tie. Writers of guidelines developed and funded by governments were less likely to have undisclosed financial ties (8.1% vs 30.6%; risk ratio 0.26; 95% CI 0.13 to 0.53; P-value <0.001)

**Conclusions:** Almost one in four guideline writers with no disclosed ties may have potentially relevant undisclosed ties to pharmaceutical companies. These data confirm the need for strategies to ensure greater transparency and more independence in relationships between guidelines and industry.

### Strengths and Limitations of this study

- Our study is the largest to date to examine undisclosed ties of guideline writers, and includes a broad sample of guidelines across ten disease categories
- Our study includes guidelines with different funding and development arrangements, enabling comparison of guidelines funded and developed by government, with other guidelines
- Our study did not investigate the undisclosed ties of guideline writers who had disclosed ties in the sample of guidelines analysed
- Study results likely underestimate the extent of undisclosed financial ties of guideline writers

peer review only

## Introduction

There is global concern about the nature and extent of financial ties between pharmaceutical companies and health professionals, including those who develop influential clinical practice guidelines. (1-3) In 2009 a landmark Institute of Medicine report on conflicts of interest acknowledged the importance of collaboration with industry, but warned financial ties to industry were widespread and risked jeopardizing the integrity of medical education, research, and practice, and called for greater transparency and independence. (1) A subsequent Institute of Medicine report, titled “Clinical practice guidelines we can trust”, recommended that groups developing guidelines “optimally comprise members without conflict of interest.” (2) Systematic review evidence suggests most guideline writers disclose some form of industry affiliation, with estimates between 56% and 87%. (3) There are however few data on the extent of undisclosed financial ties of guideline writers. One study of North American cholesterol and diabetes guidelines estimated 11% of writers had undisclosed ties, (4) another study of American head and neck surgery guidelines found 6% had discrepancies between disclosures and an open payments database, (5) while a Danish study of 14 specialty society guidelines found 52% had undisclosed ties. (6) \*

A conflict of interest is defined as “a set of circumstances that creates a risk that professional judgment or actions regarding a primary interest will be unduly influenced by a secondary interest.” (1) A primary interest of a guideline writer may be maximising health outcomes, and a secondary interest could be personal gain derived from a financial relationship with a company active in the relevant therapeutic area. Evidence from other areas, such as clinical trials, has shown such conflicts of interest may introduce bias. A recent systematic review found drug trials sponsored by industry more often have efficacy results and conclusions favourable to the sponsor. (7) Similarly, a cross-sectional study of randomised trials found those authored by principal investigators with ties to pharmaceutical companies were more likely than other trials to report favourable results. (8) Such evidence has provoked debate about the optimum constitution of guideline groups, with calls for chairs and a majority of writers to be free of financial ties, (9,10) as well as recommendations for exclusion of any conflicted writer. (2)

*\*For consistency the term guideline writer is used throughout to refer to those who develop, draft and author guidelines.*

1  
2  
3 In Australia, the publicly funded National Health and Medical Research Council (NHMRC)  
4 is currently engaged in improving standards for guideline development, including in relation  
5 to transparency and management of conflicts of interest. An internal analysis of nine years of  
6 Australian guidelines made available via the NHMRC guideline portal, 2005-2013, found  
7 only 12% of guidelines published declarations of the conflicts of interest of guideline writers.  
8 (11) As part of work to improve standards of guidelines which can have direct impacts on  
9 how clinicians deliver care to their patients, the NHMRC is developing new “guidelines for  
10 guidelines”, and a draft released for public comment in 2017 included the recommendation:  
11 “Organisations planning guidelines should aim to appoint a guideline development group  
12 whose members have no financial or other links with relevant industry groups.” (12) In order  
13 to inform on-going efforts to improve guideline quality in Australia and internationally, our  
14 objective was to investigate the extent of undisclosed financial ties to industry, for a broad  
15 cross-section of guideline writers from different categories of guideline developer, sampled  
16 from a comprehensive national guideline database, across a wide spectrum of diseases.  
17  
18  
19  
20  
21  
22  
23  
24  
25  
26

## 27 **Methods**

28  
29 We conducted a cross-sectional study of a stratified random sample of Australian clinical  
30 practice guidelines and followed the STROBE checklist for reporting observational studies.  
31 (see Supplementary file 1) (13)  
32  
33  
34

### 35 *Sampling guidelines*

36  
37 We identified a stratified random sample of clinical practice guidelines from within the  
38 NHMRC guidelines database, across nine government designated health priority areas,  
39 ([https://www.nhmrc.gov.au/book/nhmrc-corporate-plan-2016-2017/nhmrc-s-strategic-  
40 direction/major-health-issues](https://www.nhmrc.gov.au/book/nhmrc-corporate-plan-2016-2017/nhmrc-s-strategic-direction/major-health-issues)), plus kidney/urogenital, published in the years 2012-2014. The  
41 NHMRC database comprised guidelines made available on the publicly accessible NHMRC  
42 guidelines portal, which aimed to include all Australian guidelines, defined broadly as  
43 published articles making clinical recommendations. While the NHMRC portal at that time  
44 included all Australian guidelines, it also **provided users of the portal with information on  
45 quality indicators for these guidelines, such as whether the guideline was based on a  
46 systematic review of evidence, whether the authors provided COI disclosures, and whether or  
47 not the guideline had been approved by NHMRC.** From 2015, the NHMRC portal restricted  
48 the inclusion of guidelines to only include guidelines which met certain quality standards, so  
49  
50  
51  
52  
53  
54  
55  
56  
57  
58

1  
2  
3 to achieve a representative sample from the comprehensive collection of widely used  
4 Australian guidelines, we analysed guidelines available on the portal in the three years  
5 leading up to the change.  
6  
7

8 In 2017 NHMRC staff (HJ) identified all guidelines in the database, published in the years  
9 2012-2014, and used previous coding by NHMRC to exclude articles not relevant to the ten  
10 health areas of interest, those not considered guidelines, including those coded as Evidence  
11 Reviews, Posters/Flowcharts, Standards, and Summary guidelines. Following the initial  
12 screen, each guideline was randomly ordered using Microsoft Excel, within each of the ten  
13 health areas. Two authors (LB, RM) then assessed each guideline in the order they had been  
14 ranked, against explicit inclusion criteria, and identified guideline writers to be included in  
15 the analysis. Guidelines were included if they were associated with a professional  
16 organisation or entity and made mention of medicines in recommendations. They were  
17 excluded if they were a journal article unconnected from an external organisation, or if no  
18 author names or full text was available. Guideline writers listed in the guideline were  
19 included for analysis if they were explicitly engaged in developing, preparing or writing the  
20 guideline, and excluded if they were external consultants, members of oversight committees,  
21 or staff from a drug company, NHMRC, or administrative staff. Any discrepancies were  
22 resolved by discussion.  
23  
24  
25  
26  
27  
28  
29  
30  
31  
32

33 The primary unit of analysis was the guideline writer. Based on assumptions that 10% of  
34 guideline writers might have an undisclosed relevant financial tie, and that guidelines would  
35 have 4-20 writers each, we estimated a need for a minimum sample of 12 guidelines – aiming  
36 for approximately 140 writers – to produce a confidence interval of a width of 10% around  
37 our estimate of the proportion of writers with undisclosed ties. In addition, to obtain as broad  
38 a cross-section as possible, we aimed to analyse up to four guidelines per health  
39 priority/disease area, depending on guideline availability.  
40  
41  
42  
43  
44

#### 45 *Guideline and author information*

46  
47  
48 One investigator (either AL or RM) extracted all relevant information from each included  
49 guideline into the REDCap electronic data capture tools hosted at the University of Sydney.  
50 (14) The extracted information included the names of all included writers, classified in one  
51 of three ways: disclosure of ties; disclosure of no ties; no disclosure present. Disclosures  
52 were those included in the guideline document or associated publicly available documents.  
53  
54  
55  
56  
57  
58  
59  
60



1  
2  
3 Information on whether the guideline had a statement on conflicts of interest, and the  
4 developer/s and funder/s was also extracted.  
5

#### 6 7 *Identification of potentially relevant undisclosed financial ties*

8  
9 For any guideline writer with no declaration present, or who declared no conflicts of interests,  
10 one investigator (AL or RM) conducted a search of the writer's publications in the five years  
11 before the year of guideline publication. The period of five years was chosen for the  
12 following reasons: many guidelines are estimated to be at least two years in development  
13 before the year of publication; disclosures are directly relevant at the start of the process of  
14 guideline development; World Health Organization guidance suggests a period of 4 years  
15 prior to publication is relevant when disclosing financial ties, (15); and many disclosure  
16 policies have a recall period of 3 to 5 years. (16) Publications were also searched in the three  
17 years following guideline publication, as some organisations, including the Institute of  
18 Medicine, recommend guideline writers be free of conflicts for periods of time after guideline  
19 publication. (17)  
20  
21  
22  
23  
24  
25  
26

27  
28 The Scopus database was used to search for publications of guideline writers using their  
29 names and affiliations. Full texts were obtained. Searches were conducted from the earliest  
30 date, and as per Forsyth et al. (18) were stopped once a potentially relevant financial tie was  
31 identified. A potentially relevant tie was defined as a financial tie to a pharmaceutical  
32 company actively marketing or in late stages of bringing a medicine to market in the  
33 therapeutic area relevant to the guideline, at the time of the guideline publication, determined  
34 through searches of company websites and relevant product information material.  
35  
36  
37  
38  
39  
40  
41  
42  
43  
44  
45  
46  
47  
48  
49  
50  
51  
52  
53  
54  
55  
56  
57  
58  
59  
60

Categorisation of ties was developed based on criteria set by the International Committee of Medical Journal Editors, ICMJE, and based on adaptations of ICMJE criteria used in a previous study, (18) including: grants (funding for research study); personal fees (consulting, advisory, speakers, honoraria, travel); patents/copyrights/royalties; miscellaneous. Once a potentially relevant tie was identified by one author (AL or RM), a second author (RM or LB) double checked the full text of the disclosure and verified the tie as a potentially relevant tie, and any discrepancies were resolved by discussion. Searches were conducted between August and December 2017.

#### 53 *Outcome measures and statistical analysis*

1  
2  
3 The primary outcome measures were specified as the proportion of guideline writers with  
4 potentially relevant undisclosed ties, and the proportion of guidelines in the sample which  
5 included at least one writer with an undisclosed tie. Secondary outcome measures were: the  
6 proportion of writers with disclosed ties; the proportion of guidelines which have any  
7 statement about conflicts of interest; and the proportion of guidelines developed and funded  
8 by governments (state, federal or territories). We report data proportions using descriptive  
9 statistics and including 95% confidence intervals. We examined the association between  
10 having statements and the proportion of potentially relevant undisclosed ties of writers; and  
11 the association between a guideline being developed and funded by government/s and the  
12 proportion of potentially relevant undisclosed ties of writers. Potential associations were  
13 tested using the chi-square test. Confidence intervals were not adjusted for clustering of  
14 writers within multiple guidelines, or for clustering of guidelines within disease area.  
15  
16  
17  
18  
19  
20  
21  
22

### 23 *Ethics*

24  
25 As all publications analysed for this study were on the public record, the chair of Bond  
26 University's Human Research Ethics committee asserted that the study did not require ethics  
27 review, if no individuals were identified or described.  
28  
29  
30

### 31 *Patient and Public Involvement*

32  
33 No patients or members of the public were involved in this study.  
34  
35

## 36 **Results**

### 37 *Characteristics of Guidelines*

38  
39 There was a total of 347 guidelines in the NHMRC database, published 2012-2014. (Figure  
40 1) The initial screen excluded 11 items not considered guidelines, coded by NHMRC as  
41 Evidence Reviews, Posters/Flowcharts, Standards, and Summary guidelines, 62 because they  
42 did not contain names of those who had developed the guideline and 129 published outside  
43 the ten health areas in this study. The remaining 145 guidelines were assigned a random  
44 number to establish a random order for assessment of the guidelines within each of the ten  
45 health areas. We continued to assess guidelines within each area in random order until we had  
46 included 4 for each health area or had completed assessing all the available guidelines in a  
47 given health area. In total, LB and RM assessed 82 guidelines. Forty-nine of those  
48 guidelines were excluded after assessment: because they were a publication only with no  
49  
50  
51  
52  
53  
54  
55  
56  
57  
58  
59  
60

1  
2  
3 affiliation to any external organisation (n=22); had no recommendations about medications  
4 (n=25); or the full text or author list of the guideline was not publicly available. (n=2) Sixty-  
5 three were not assessed.  
6

7  
8 We included 33 guidelines in our final sample: arthritis/musculoskeletal(n=3); asthma(n=4);  
9 cancer(n=4); cardiovascular(n=4); diabetes (n=4); injury(n=4); mental health(n=4);  
10 neurological(n=1); obesity(n=1); kidney/urogenital(n=4). (Supplementary file 2) The 33  
11 guidelines involved a total of 402 guideline writers, with individual guidelines having  
12 between 2 and 35 writers included for analysis.  
13  
14

### 15 *Prevalence of undisclosed ties*

16  
17 Among all 402 guideline writers, 58 disclosed ties. (14%; 95% CI, 11% to 18%)(Table 1)  
18  
19 Among the 402 writers, 344 had no disclosed ties, (86%; 95% CI 82% to 89%) including 228  
20 writers where no disclosures appeared, and 116 writers with statements that they had no ties.  
21  
22 Of the 344 writers with no disclosed ties, 83 had at least one potentially relevant undisclosed  
23 tie, (24%; 95% CI, 20% to 29%), discovered in the published literature in the same year as  
24 the guideline was published or the previous 5 years. Of those undisclosed ties, the first  
25 category of tie listed in the relevant disclosure was: pharmaceutical company grant (64%), or  
26 personal fees, (36%). If the time frame was extended to 3 years after the guideline, the  
27 proportion of potentially relevant undisclosed ties rose from 24% to 28%. (95% CI, 23% to  
28 33%)  
29  
30

31  
32 Of 33 guidelines, 23 included at least one writer with a potentially relevant undisclosed tie.  
33 (70%; 95% CI, 51% to 84%). (Figure 2) Of those 23 guidelines, 14 guidelines had 20% or  
34 more writers who disclosed no ties, but had potentially relevant undisclosed ties. Figure 2  
35 also reveals the proportion of undisclosed ties of guideline writers who disclosed no ties, per  
36 guideline, grouped by disease category.  
37  
38

### 39 *Guideline Characteristics and Undisclosed Ties*

40  
41 Guidelines which included any statement about conflicts of interest were not significantly  
42 different from those without statements, 59 of 223 writers (27%) had potentially relevant  
43 undisclosed ties, compared to 24 of 121 writers. (20%) (risk ratio 1.33; 95% CI 0.88 to 2.03;  
44 P-value =0.170) (Table 2) Guidelines both developed and funded by governments, as  
45 opposed to non-government groups (including professional bodies, foundations, or  
46 pharmaceutical companies), were significantly less likely to have authors with potentially  
47  
48  
49  
50  
51  
52  
53  
54  
55  
56  
57  
58

1  
2  
3 relevant undisclosed ties, 8 of 99 writers (8%) compared to 75 of 245 writers. (31%) (risk  
4 ratio 0.26; 95% CI 0.13 to 0.53; P-value <0.001)  
5

## 6 **Discussion**

7  
8  
9 In this broad cross-sectional sample of Australian clinical practice guidelines, 14% of  
10 guideline writers had published disclosures of conflicts of interest. Among those who either  
11 had no disclosures or disclosed they had no conflicts, 24% – almost one in four – had at least  
12 one potentially relevant undisclosed financial tie to a pharmaceutical company active in the  
13 therapeutic area. More than two-thirds, or 70%, of the 33 guidelines in this sample had at  
14 least one writer with an undisclosed tie. Undisclosed financial ties of guideline writers  
15 appeared to be more common in some therapeutic areas such as diabetes and cardiovascular  
16 disease, compared to other areas such as injury and mental health. Guideline writers working  
17 on guidelines developed and funded by government were much less likely to have  
18 undisclosed financial ties: 8% compared to 31%.  
19  
20  
21  
22  
23  
24  
25

26  
27 There are important limitations to this study. First, the results likely underestimate the  
28 frequency of undisclosed ties for several reasons: there is a general under-reporting of ties  
29 published in medical journals as many important transfers of benefits to professionals, such  
30 as hospitality or industry-subsidised education, are not routinely disclosed; Australia did not  
31 at the time have a database with information on company payments to individuals; and we  
32 did not search for any potentially relevant undisclosed ties of writers who made disclosures of  
33 ties in the guideline, whether those ties were to pharmaceutical companies or other groups.  
34  
35 Second, our results may tend to a small degree to overestimate the frequency of undisclosed  
36 ties, through what some may see as a broad definition of potential relevance; for example,  
37 categorising a co-investigator of a study funded by a pharmaceutical company active in the  
38 therapeutic area as a potentially relevant tie. Third, the sample of guidelines, while broad and  
39 accessible, comes from 2012-2014 – the most recent years available for this sample from a  
40 comprehensive collection – admitting the possibility of change since that time. And fourth,  
41 we looked only at financial ties, not other non-financial conflicts of interest. The strengths of  
42 the study lie in it being the largest to date in terms of guideline writers and undisclosed ties to  
43 industry, as well as covering a broad cross-section of disease categories and guideline  
44 developers – both government and non-government – with previous smaller studies limited to  
45 specific therapeutic areas, (4,5) or guidelines produced only by specialty societies. (6)  
46  
47  
48  
49  
50  
51  
52  
53  
54  
55  
56  
57  
58  
59  
60

1  
2  
3 Neuman and colleagues investigated the prevalence of conflicts of interest among panels  
4 producing 14 North American guidelines for high cholesterol and diabetes. (4) They reported  
5 that among writers who formally declared no conflicts, 11% had one or more. Looking at a  
6 small sample of 49 writers of head and neck surgery guidelines, Horn and colleagues found  
7 6% had discrepancies between guideline disclosures and information available in the Open  
8 Payments transparency database. (5) Analysing Danish specialty society guidelines, and  
9 cross-checking disclosures against a public register of disclosures, Bindsley and colleagues  
10 estimated 52% of 254 guideline writers had not disclosed ties. (6) A possible explanation of  
11 why our estimate of 24% sits within these finding is that the North American studies used  
12 narrower timeframes to search for undisclosed ties, while the Danish study defined a conflict  
13 of interest as any affiliation with any drug company.  
14  
15  
16  
17  
18  
19  
20  
21

22 As others have stated, guideline writer ties to companies with interest in the guideline's  
23 outcome raise critical questions about potential bias in processes that may have great impacts  
24 on the use of healthcare interventions, (4,12) disease definitions, (19) and patient care.  
25 Findings of potentially relevant undisclosed ties compound the problem further and raise the  
26 spectre of hidden bias, increasing the wariness of guideline users. Contemporary community  
27 standards now demand total transparency, and our findings of undisclosed ties add weight to  
28 calls for reforms like the Sunshine Act and Open Payments system in the United States, (20)  
29 "publicly accessible registries of researcher conflicts of interest", (21) and more immediately,  
30 enforcement of current disclosure policies to minimise undisclosed ties. In line with repeated  
31 recommendations for greater independence between health professionals and industry,  
32 (1,2,12) our incidental finding that almost one in five of these guidelines had less than 10% of  
33 writers with any ties to industry, shows it is possible to assemble guideline panels almost  
34 entirely free of financial conflicts of interest.  
35  
36  
37  
38  
39  
40  
41  
42  
43  
44

45 The related reform processes of enhanced transparency and greater independence underway  
46 in many nations creates clear opportunities for research comparing the quality of guidelines  
47 developed by writers with and without links to industry, a research question beyond the scope  
48 of this study, and where there is currently limited data. (22) Similarly, there is need for more  
49 research investigating the impacts of links between industry and the professional  
50 organisations which auspice guideline development, with one recent study suggesting such  
51 ties are "common and infrequently disclosed." (23) Given their potential influence over  
52 human health, and health system sustainability, such vital research on the independence and  
53  
54  
55  
56  
57  
58  
59  
60

1  
2  
3 trustworthiness of guidelines will be greatly enhanced by complete transparency around the  
4 financial conflicts of interest of those developing them.  
5  
6  
7  
8  
9  
10  
11  
12  
13  
14  
15  
16  
17  
18  
19  
20  
21  
22  
23  
24

25 **Acknowledgements:** We would like to thank Edward Luca, who helped develop the search  
26 for guideline writer publications.  
27  
28  
29

---

30  
31  
32 **Copyright/license for publication:**  
33

34  
35 The Corresponding Author has the right to grant on behalf of all authors and does grant on  
36 behalf of all authors, a [worldwide licence](#) to the Publishers and its licensees in perpetuity, in  
37 all forms, formats and media (whether known now or created in the future), to i) publish,  
38 reproduce, distribute, display and store the Contribution, ii) translate the Contribution into  
39 other languages, create adaptations, reprints, include within collections and create summaries,  
40 extracts and/or, abstracts of the Contribution, iii) create any other derivative work(s) based on  
41 the Contribution, iv) to exploit all subsidiary rights in the Contribution, v) the inclusion of  
42 electronic links from the Contribution to third party material where-ever it may be located;  
43 and, vi) licence any third party to do any or all of the above.  
44  
45  
46  
47  
48

49 **Conflicts of Interest:**

50  
51 Competing interests: All authors have completed the ICMJE uniform disclosure form  
52 at [www.icmje.org/coi\\_disclosure.pdf](http://www.icmje.org/coi_disclosure.pdf) and declare: RM and EB have received grant support  
53 from NHMRC; LB is a member of the NHMRC committee developing the guidelines for  
54 guidelines handbook.  
55  
56  
57

**Contributor Statement:**

RM, AL, HJ, GD, SG, LB conceived and designed the study. RM and LB supervised the study. RM, AL, EB, LB analysed the data. RM, AL, HJ, GD, SG, EB, LB interpreted the data. RM wrote the first draft of the manuscript, and RM, AL, HJ, GD, SG, EB, LB were involved in revisions of manuscript.

**Contributor and guarantor information:**

All authors contributed to the planning, conduct and reporting of this study, and RM and LB are guarantors.

**Data Sharing Statement:**

We will share data where possible, within confines of guidance from Bond University Ethics Committee that the paper does not identify or describe any individuals.

**Transparency Declaration:**

The lead author affirms that the manuscript is an honest, accurate, and transparent account of the study being reported; that no important aspects of the study have been omitted; and that any discrepancies from the study as originally planned have been explained.

**Funding source:**

RM is supported by a research fellowship funded by NHMRC, GNT1124207; HJ was an employee of NHMRC; SG and GD are employees of NHMRC. EB is supported by grants from NHMRC to the Centre for Research in Evidence-Based Practice, Bond University. LB is an employee of The University of Sydney and had no funding specifically for this work. All authors had full access to all data and can take responsibility for the integrity of the data and the accuracy of the data analysis.

**Supplementary File 1: Strobe checklist (attached)**

1  
2  
3  
4  
5  
6  
7 **Figure 1. Flowchart for sample**  
8  
9  
10  
11  
12  
13  
14  
15  
16  
17  
18  
19  
20  
21  
22  
23  
24  
25  
26  
27

28 **Figure 2: Proportion of Australian clinical practice guideline writers with undisclosed**  
29 **ties, 2012-2014**  
30  
31  
32  
33  
34  
35  
36  
37  
38  
39  
40  
41  
42  
43  
44  
45  
46  
47  
48  
49  
50  
51  
52  
53  
54  
55  
56  
57  
58  
59  
60



**Table 1. Characteristics of guideline writers from a stratified random sample of guidelines, 2012-2014. (n=33)**

| Therapeutic area | Clinical practice guideline (ID #) | Total number of writers | No. with disclosed ties | Number with no disclosed ties | COI statement available | Developed & funded by government |
|------------------|------------------------------------|-------------------------|-------------------------|-------------------------------|-------------------------|----------------------------------|
| Arthritis        | 1                                  | 15                      | 0                       | 15                            | Yes                     | No                               |
|                  | 2                                  | 26                      | 2                       | 24                            | Yes                     | No                               |
|                  | 3                                  | 6                       | 0                       | 6                             | No                      | Yes                              |
| Asthma           | 4                                  | 14                      | 0                       | 14                            | No                      | Yes                              |
|                  | 5                                  | 7                       | 0                       | 7                             | No                      | No                               |
|                  | 6                                  | 6                       | 0                       | 6                             | No                      | No                               |
|                  | 7                                  | 6                       | 4                       | 2                             | Yes                     | No                               |
| Cancer           | 8                                  | 27                      | 4                       | 23                            | Yes                     | No                               |
|                  | 9                                  | 6                       | 1                       | 5                             | Yes                     | No                               |
|                  | 10                                 | 14                      | 0                       | 14                            | Yes                     | Yes                              |
|                  | 11                                 | 31                      | 0                       | 31                            | No                      | Yes                              |
| Cardio-vascular  | 12                                 | 11                      | 4                       | 7                             | Yes                     | No                               |
|                  | 13                                 | 4                       | 0                       | 4                             | No                      | No                               |
|                  | 14                                 | 8                       | 1                       | 7                             | Yes                     | No                               |
|                  | 15                                 | 34                      | 0                       | 34                            | Yes                     | No                               |
| Diabetes         | 16                                 | 4                       | 0                       | 4                             | No                      | No                               |
|                  | 17                                 | 14                      | 0                       | 14                            | No                      | No                               |
|                  | 18                                 | 5                       | 5                       | 0                             | Yes                     | No                               |
|                  | 19                                 | 13                      | 0                       | 13                            | Yes                     | No                               |
| Injury           | 20                                 | 18                      | 0                       | 18                            | No                      | Yes                              |
|                  | 21                                 | 2                       | 0                       | 2                             | No                      | Yes                              |
|                  | 22                                 | 35                      | 4                       | 31                            | Yes                     | No                               |
|                  | 23                                 | 9                       | 0                       | 9                             | Yes                     | Yes                              |

|               |       |     |    |     |     |     |
|---------------|-------|-----|----|-----|-----|-----|
| Kidney        | 24    | 7   | 1  | 6   | Yes | No  |
|               | 25    | 9   | 2  | 7   | Yes | No  |
|               | 26    | 6   | 2  | 4   | Yes | No  |
|               | 27    | 13  | 0  | 13  | No  | No  |
| Mental Health | 28    | 10  | 10 | 0   | Yes | Yes |
|               | 29    | 11  | 11 | 0   | Yes | Yes |
|               | 30    | 9   | 0  | 9   | Yes | No  |
|               | 31    | 8   | 0  | 8   | Yes | No  |
| Neurological  | 32    | 2   | 0  | 2   | No  | No  |
| Obesity       | 33    | 12  | 7  | 5   | Yes | Yes |
|               | Total | 402 | 58 | 344 |     |     |

**Table 2. Proportion of guidelines writers with undisclosed financial ties by guideline type.**

|                                          | Yes                   | No                    | Risk ratio (95% CI)        | P-value          |
|------------------------------------------|-----------------------|-----------------------|----------------------------|------------------|
| <b>COI Statement in Guideline</b>        | <b>59/223 (26.5%)</b> | <b>24/121 (19.8%)</b> | <b>1.33 (0.88 to 2.03)</b> | <b>0.170</b>     |
| <b>Developed, funded by government/s</b> | <b>8/99 (8.1%)</b>    | <b>75/245 (30.6%)</b> | <b>0.26 (0.13 to 0.53)</b> | <b>&lt;0.001</b> |

Note: p value refers to chi-square test

## References

1. Lo B, Field MJ. *Conflict of Interest in Medical Research, Education, and Practice*. Editors: Institute of Medicine (US) Committee on Conflict of Interest in Medical Research, Education, and Practice. Washington (DC): National Academies Press (US); 2009.
2. Institute of Medicine. *Clinical Practice Guidelines We Can Trust*, Report Brief; Washington, D.C.: The National Academies Press; 2011.
3. Norris SL, Holmer HK, Ogden LA, et al. Conflict of Interest in Clinical Practice Guideline Development: A Systematic Review. *PLoS One* 2011; 6(10): e25153.
4. Neuman J, Korenstein D, Ross JS, et al. Prevalence of financial conflicts of interest among panel members producing clinical practice guidelines in Canada and United States: cross sectional study. *BMJ* 2011;343:d5621.
5. Horn J, Checketts JX, Jawhar O, et al. Evaluation of Industry Relationships Among Authors of Otolaryngology Clinical Practice Guidelines. *JAMA Otolaryngol Head Neck Surg* Published online January 4, 2018.
6. Bindsley JB, Schroll J, Gøtzsche P, et al. Underreporting of conflicts of interest in clinical practice guidelines: cross sectional study. *BMC Med Ethics* 2013;14:19.
7. Lundh A, Lexchin J, Mintzes B, et al. Industry Sponsorship and research outcome *Cochrane Database of Systematic Reviews*, First Published 16 February 2017.
8. Ahn R, Woodbridge A, Abraham A, et al. Financial ties of principal investigators and randomized controlled trial outcomes: cross sectional study. *BMJ* 2017;356:i6770.
9. Guyatt G, Akl EA, Hirsh J, et al. The vexing problem of guidelines and conflict of interest: a potential solution. *Ann Intern Med* 2010;152(11):738-41.
10. Handbook for Guideline Development, WHO 2<sup>nd</sup> ed, Geneva, 2014
11. National Health and Medical Research Council. 2014 Annual Report on Australian Clinical Practice Guidelines. Canberra: National Health and Medical Research Council; 2014.
12. National Health and Medical Research Council. Identifying and managing conflicts of interest. NHMRC Public Consultation Version, October 30, 2017. Available at

- 1  
2  
3 [https://consultations.nhmrc.gov.au/files/consultations/drafts/identifyingandmanagingc](https://consultations.nhmrc.gov.au/files/consultations/drafts/identifyingandmanagingconflictsofinterest.pdf)  
4 [onflictsofinterest.pdf](https://consultations.nhmrc.gov.au/files/consultations/drafts/identifyingandmanagingconflictsofinterest.pdf) Accessed April 12, 2018  
5  
6  
7 13. STROBE Statement—Checklist of items that should be included in reports of cross-  
8 sectional studies Available at [https://www.strobe-](https://www.strobe-statement.org/fileadmin/Strobe/uploads/checklists/STROBE_checklist_v4_cross-sectional.pdf)  
9 [statement.org/fileadmin/Strobe/uploads/checklists/STROBE\\_checklist\\_v4\\_cross-](https://www.strobe-statement.org/fileadmin/Strobe/uploads/checklists/STROBE_checklist_v4_cross-sectional.pdf)  
10 [sectional.pdf](https://www.strobe-statement.org/fileadmin/Strobe/uploads/checklists/STROBE_checklist_v4_cross-sectional.pdf) Accessed April 12, 2018  
11  
12  
13 14. Harris PA, Taylor R, Thielke R, et al. Research electronic data capture (REDCap)—A  
14 metadata-driven methodology and workflow process for providing translational  
15 research informatics support. *J Biomed Informatics* 2009;42(2):377-81.  
16  
17 15. World Health Organization. WHO Conflict of Interest Guidelines. Declaration of  
18 interests for WHO experts. 2010. Available at <http://keionline.org/node/1062>  
19 Accessed April 12, 2018.  
20  
21  
22 16. Boyd EA, Bero LA. Improving the use of research evidence in guideline  
23 development: 4. Managing conflicts of interests, *Health Research Policy and Systems*  
24 2006; 4: 16  
25  
26  
27 17. Institute of Medicine, Board on Health Care Services, Committee on Standards for  
28 Developing Trustworthy Clinical Practice guidelines. *Clinical Practice Guidelines we*  
29 *can trust*. Washington, DC, National Academies Press; 2011.  
30  
31  
32 18. Forsyth S, Odierna D, Krauth D et al. Conflicts of interest and critiques of the use of  
33 systematic reviews in policymaking: an analysis of opinion articles. *Systematic*  
34 *Reviews* 2014;3:122.  
35  
36  
37 19. Moynihan RN, Cooke GPE, Doust JA, et al. Expanding Disease Definitions in  
38 Guidelines and Expert Panel Ties to Industry: A Cross-sectional Study of Common  
39 Conditions in the United States. *PLoS Med* 2013;10(8): e1001500.  
40  
41  
42 20. Centres for Medicare & Medicaid Services, Open Payments database. Available at  
43 <https://www.cms.gov/openpayments/> Accessed April 12, 2018.  
44  
45  
46 21. Dunn AG, Coiera E, Mandl KD, et al. Conflict of interest disclosure in biomedical  
47 research: A review of current practices, biases, and the role of public registries in  
48 improving transparency. *Res Integr Peer Rev* 2019;1.Pii:1 Epub 2016 May 3.  
49  
50  
51 22. Cosgrove L, Bursztajn HJ, Erlich DR, et al. Conflicts of interest and the quality of  
52 recommendations in clinical guidelines. *J Eval Clin Pract* 2013 Aug;19(4):674-81.  
53  
54  
55  
56  
57  
58  
59  
60

- 1  
2  
3 23. Campsall P, Colizza K, Straus S, Stelfox HT. Financial Relationships between  
4 Organizations That Produce Clinical Practice Guidelines and the Biomedical Industry:  
5 A Cross-Sectional Study. *PLoS Med* 2016;13(5):e1002029.  
6  
7  
8  
9  
10  
11  
12  
13  
14  
15  
16  
17  
18  
19  
20  
21  
22  
23  
24  
25  
26  
27  
28  
29  
30  
31  
32  
33  
34  
35  
36  
37  
38  
39  
40  
41  
42  
43  
44  
45  
46  
47  
48  
49  
50  
51  
52  
53  
54  
55  
56  
57  
58  
59  
60

For peer review only

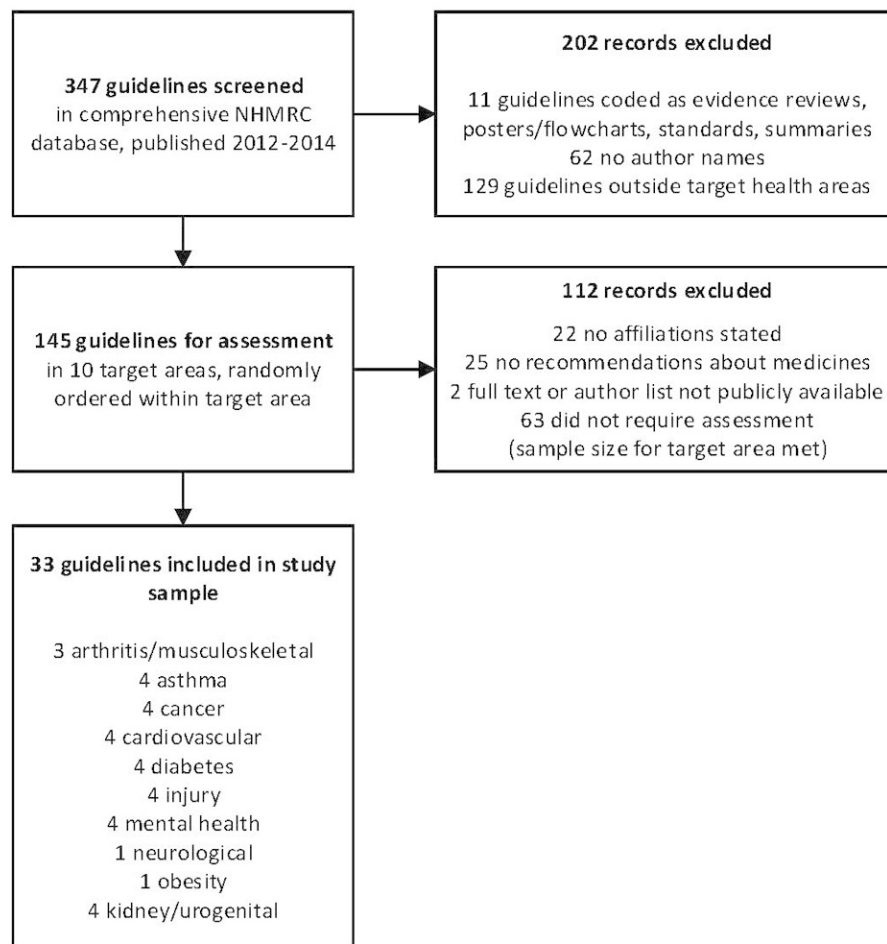

Figure 1. Flowchart for sample

88x90mm (300 x 300 DPI)

1  
2  
3  
4  
5  
6  
7  
8  
9  
10  
11  
12  
13  
14  
15  
16  
17  
18  
19  
20  
21  
22  
23  
24  
25  
26  
27  
28  
29  
30  
31  
32  
33  
34  
35  
36  
37  
38  
39  
40  
41  
42  
43  
44  
45  
46  
47  
48  
49  
50  
51  
52  
53  
54  
55  
56  
57  
58  
59  
60

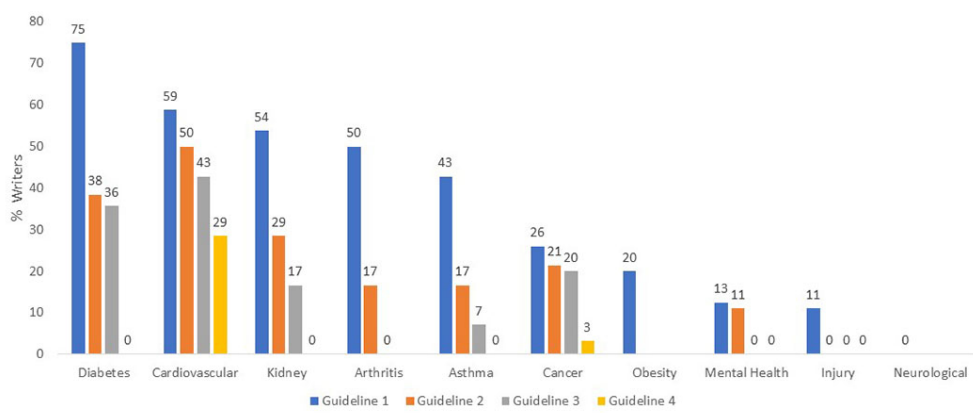

Figure 2. Proportion of Australian clinical practice guideline writers with undisclosed ties, 2012-2014

90x39mm (300 x 300 DPI)

STROBE Statement—Checklist of items that should be included in reports of *cross-sectional studies* (Page numbers refer to those on original submitted word document)

For manuscript: “Undisclosed financial ties between guideline writers and pharmaceutical companies: a cross-sectional study across ten disease categories”, submitted by Moynihan et al., 060818

|                              | Item No | Recommendation                                                                                                                                                                                      | Item page nr      |
|------------------------------|---------|-----------------------------------------------------------------------------------------------------------------------------------------------------------------------------------------------------|-------------------|
| <b>Title and abstract</b>    | 1       | (a) Indicate the study’s design with a commonly used term in the title or the abstract                                                                                                              | 1                 |
|                              |         | (b) Provide in the abstract an informative and balanced summary of what was done and what was found                                                                                                 | 2                 |
| <b>Introduction</b>          |         |                                                                                                                                                                                                     |                   |
| Background/rationale         | 2       | Explain the scientific background and rationale for the investigation being reported                                                                                                                | 3                 |
| Objectives                   | 3       | State specific objectives, including any prespecified hypotheses                                                                                                                                    | 4                 |
| <b>Methods</b>               |         |                                                                                                                                                                                                     |                   |
| Study design                 | 4       | Present key elements of study design early in the paper                                                                                                                                             | 4                 |
| Setting                      | 5       | Describe the setting, locations, and relevant dates, including periods of recruitment, exposure, follow-up, and data collection                                                                     | 4-6               |
| Participants                 | 6       | (a) Give the eligibility criteria, and the sources and methods of selection of participants                                                                                                         | 4-5               |
| Variables                    | 7       | Clearly define all outcomes, exposures, predictors, potential confounders, and effect modifiers. Give diagnostic criteria, if applicable                                                            | 5-6               |
| Data sources/<br>measurement | 8*      | For each variable of interest, give sources of data and details of methods of assessment (measurement). Describe comparability of assessment methods if there is more than one group                | 4-6               |
| Bias                         | 9       | Describe any efforts to address potential sources of bias                                                                                                                                           | N/A               |
| Study size                   | 10      | Explain how the study size was arrived at                                                                                                                                                           | 5                 |
| Quantitative variables       | 11      | Explain how quantitative variables were handled in the analyses. If applicable, describe which groupings were chosen and why                                                                        | 6                 |
| Statistical methods          | 12      | (a) Describe all statistical methods, including those used to control for confounding                                                                                                               | 6                 |
|                              |         | (b) Describe any methods used to examine subgroups and interactions                                                                                                                                 | 6                 |
|                              |         | (c) Explain how missing data were addressed                                                                                                                                                         | N/A               |
|                              |         | (d) If applicable, describe analytical methods taking account of sampling strategy                                                                                                                  | N/A               |
|                              |         | (e) Describe any sensitivity analyses                                                                                                                                                               | N/A               |
| <b>Results</b>               |         |                                                                                                                                                                                                     |                   |
| Participants                 | 13*     | (a) Report numbers of individuals at each stage of study – eg numbers potentially eligible, examined for eligibility, confirmed eligible, included in the study, completing follow-up, and analysed | 7 (plus Figure 1) |
|                              |         | (b) Give reasons for non-participation at each stage                                                                                                                                                | 7 (plus Figure 1) |
|                              |         | (c) Consider use of a flow diagram                                                                                                                                                                  | Figure 1          |
| Descriptive data             | 14*     | (a) Give characteristics of study participants (eg demographic, clinical, social) and information on exposures and potential confounders                                                            | 7                 |
|                              |         | (b) Indicate number of participants with missing data for each variable of interest                                                                                                                 | N/A               |
| Outcome data                 | 15*     | Report numbers of outcome events or summary measures                                                                                                                                                | 7-8               |



|    |                          |    |                                                                                                                                                                                                              |      |
|----|--------------------------|----|--------------------------------------------------------------------------------------------------------------------------------------------------------------------------------------------------------------|------|
| 1  | Main results             | 16 | (a) Give unadjusted estimates and, if applicable, confounder-adjusted estimates and their precision (eg. 95% confidence interval). Make clear which confounders were adjusted for and why they were included | 7-8  |
| 2  |                          |    | (b) Report category boundaries when continuous variables were categorized                                                                                                                                    | N/A  |
| 3  |                          |    | (c) If relevant, consider translating estimates of relative risk into absolute risk for a meaningful time period                                                                                             | N/A  |
| 4  |                          |    |                                                                                                                                                                                                              |      |
| 5  |                          |    |                                                                                                                                                                                                              |      |
| 6  | Other analyses           | 17 | Report other analyses done – eg analyses of subgroups and interactions, and sensitivity analyses                                                                                                             | 8    |
| 7  |                          |    |                                                                                                                                                                                                              |      |
| 8  |                          |    |                                                                                                                                                                                                              |      |
| 9  |                          |    |                                                                                                                                                                                                              |      |
| 10 |                          |    |                                                                                                                                                                                                              |      |
| 11 | <b>Discussion</b>        |    |                                                                                                                                                                                                              |      |
| 12 | Key results              | 18 | Summarise key results with reference to study objectives                                                                                                                                                     | 8-9  |
| 13 | Limitations              | 19 | Discuss limitations of the study, taking into account sources of potential bias or imprecision. Discuss both direction and magnitude of any potential bias                                                   | 9    |
| 14 |                          |    |                                                                                                                                                                                                              |      |
| 15 | Interpretation           | 20 | Give a cautious overall interpretation of results considering objectives, limitations, multiplicity of analyses, results from similar studies, and other relevant evidence                                   | 9-10 |
| 16 |                          |    |                                                                                                                                                                                                              |      |
| 17 | Generalisability         | 21 | Discuss the generalisability (external validity) of the study results                                                                                                                                        | 9-10 |
| 18 |                          |    |                                                                                                                                                                                                              |      |
| 19 | <b>Other information</b> |    |                                                                                                                                                                                                              |      |
| 20 | Funding                  | 22 | Give the source of funding and the role of the funders for the present study and, if applicable, for the original study on which the present article is based                                                | 12   |
| 21 |                          |    |                                                                                                                                                                                                              |      |
| 22 |                          |    |                                                                                                                                                                                                              |      |
| 23 |                          |    |                                                                                                                                                                                                              |      |
| 24 |                          |    |                                                                                                                                                                                                              |      |
| 25 |                          |    |                                                                                                                                                                                                              |      |
| 26 |                          |    |                                                                                                                                                                                                              |      |
| 27 |                          |    |                                                                                                                                                                                                              |      |
| 28 |                          |    |                                                                                                                                                                                                              |      |
| 29 |                          |    |                                                                                                                                                                                                              |      |
| 30 |                          |    |                                                                                                                                                                                                              |      |
| 31 |                          |    |                                                                                                                                                                                                              |      |
| 32 |                          |    |                                                                                                                                                                                                              |      |
| 33 |                          |    |                                                                                                                                                                                                              |      |
| 34 |                          |    |                                                                                                                                                                                                              |      |
| 35 |                          |    |                                                                                                                                                                                                              |      |
| 36 |                          |    |                                                                                                                                                                                                              |      |
| 37 |                          |    |                                                                                                                                                                                                              |      |
| 38 |                          |    |                                                                                                                                                                                                              |      |
| 39 |                          |    |                                                                                                                                                                                                              |      |
| 40 |                          |    |                                                                                                                                                                                                              |      |
| 41 |                          |    |                                                                                                                                                                                                              |      |
| 42 |                          |    |                                                                                                                                                                                                              |      |
| 43 |                          |    |                                                                                                                                                                                                              |      |
| 44 |                          |    |                                                                                                                                                                                                              |      |
| 45 |                          |    |                                                                                                                                                                                                              |      |
| 46 |                          |    |                                                                                                                                                                                                              |      |
| 47 |                          |    |                                                                                                                                                                                                              |      |
| 48 |                          |    |                                                                                                                                                                                                              |      |
| 49 |                          |    |                                                                                                                                                                                                              |      |
| 50 |                          |    |                                                                                                                                                                                                              |      |
| 51 |                          |    |                                                                                                                                                                                                              |      |
| 52 |                          |    |                                                                                                                                                                                                              |      |
| 53 |                          |    |                                                                                                                                                                                                              |      |
| 54 |                          |    |                                                                                                                                                                                                              |      |
| 55 |                          |    |                                                                                                                                                                                                              |      |
| 56 |                          |    |                                                                                                                                                                                                              |      |
| 57 |                          |    |                                                                                                                                                                                                              |      |
| 58 |                          |    |                                                                                                                                                                                                              |      |
| 59 |                          |    |                                                                                                                                                                                                              |      |
| 60 |                          |    |                                                                                                                                                                                                              |      |

\*Give information separately for exposed and unexposed groups.

**Note:** An Explanation and Elaboration article discusses each checklist item and gives methodological background and published examples of transparent reporting. The STROBE checklist is best used in conjunction with this article (freely available on the Web sites of PLoS Medicine at <http://www.plosmedicine.org/>, Annals of Internal Medicine at <http://www.annals.org/>, and Epidemiology at <http://www.epidem.com/>). Information on the STROBE Initiative is available at [www.strobe-statement.org](http://www.strobe-statement.org).

## List of Guidelines

- Agency for Clinical Innovation, NSW Health. Evidence-based review for patients undergoing elective hip and knee replacement. ANZ J Surg 84 (2014) 17–24
- Osteoporosis Australia Building healthy bones throughout life: an evidence-informed strategy to prevent osteoporosis in Australia MJA Open, 2 Suppl 1, 4 February 2013
- 2013. Clinical Practice Guidelines for the Management of Rotator Cuff Syndrome in the Workplace. The University of New South Wales.
- 2012 Clinical Practice Guidelines for the acute treatment of infants and children with asthma. (NSW Health)
- National Asthma Council Australia. *Asthma and the Over 65s- An information paper for health professionals*. Melbourne, National Asthma Council Australia, 2013.
- National Asthma Council Australia. *Asthma and Healthy Living. An information paper for health professionals*. Melbourne, National Asthma Council Australia, 2013.
- Australian Asthma Handbook Version 1, 2014 (National Asthma Council of Australia)
- Chronic Kidney Disease Management in General Practice. 2<sup>nd</sup> Ed 2012 Kidney Health Australia
- National Vascular Disease Prevention Alliance. Guidelines for the management of absolute cardiovascular disease risk. 2012.
- Australian Wound Management Association. Pan Pacific Clinical Practice Guideline for the Prevention and Management of Pressure Injury. Cambridge Media Osborne Park, WA: 2012.
- National Heart Foundation of Australia and the Cardiac Society of Australia and New Zealand. Reducing risk in heart disease: an expert guide to clinical practice for secondary prevention of coronary heart disease. Melbourne: National Heart Foundation of Australia, 2012.
- PERIOPERATIVE DIABETES MANAGEMENT GUIDELINES AUSTRALIAN DIABETES SOCIETY July 2012
- Position Paper on Hereditary Angioedema Australasian Society of Clinical Immunology and Allergy 2012
- Australian and New Zealand Society for Geriatric Medicine. Position Statement 13. Delirium in Older People Revised 2012
- National Health and Medical Research Council (2012). *Clinical Practice Points on the diagnosis, assessment and management of Attention Deficit Hyperactivity Disorder in children and adolescents*. Commonwealth of Australia.
- Baker IDI Heart and Diabetes Institute. Type 2 diabetes in young Indigenous Australians in rural and remote areas: diagnosis, screening, management and prevention MJA 197 (1), 2 July 2012
- Endometriosis and Infertility – a consensus statement from ACCEPT (Australasian CREI Consensus Expert Panel on Trial evidence). Australian and New Zealand Journal of Obstetrics and Gynaecology 2012; 52: 513–522
- National Health and Medical Research Council. *Clinical Practice Guideline for the Management of Borderline Personality Disorder*. Melbourne: National Health and Medical Research Council; 2012.
- National Health and Medical Research Council (2013) Clinical practice guidelines for the management of overweight and obesity in adults, adolescents and children in Australia. Melbourne: National Health and Medical Research Council.
- Guidelines: Screening, referral and treatment for depression in patients with coronary heart disease A consensus statement from the National Heart Foundation of Australia. MJA 198 (9) · 20 May 2013
- Australian Centre for Post-Traumatic Mental Health 2013 Australian Guidelines for the Treatment of Acute Stress Disorder and Posttraumatic Stress Disorder. ACPMH Melbourne Victoria.

- 1
- 2
- 3 • KHA CARI Guideline: Early chronic kidney disease: Detection, prevention and
- 4 management. *Nephrology* 2013 :340-350
- 5 • Cancer pain management in adults. Evidence-based clinical practice guidelines adapted for
- 6 use in Australia. Cancer Guidelines Wiki. 2012
- 7 • South Australian Head and Neck Cancer Pathway 2013 © Department of Health and Ageing,
- 8 Government of South Australia
- 9 • Cancer Council Australia. Cancer Guidelines Wiki. Clinical practice guidelines for the
- 10 management of adult onset sarcoma. 2014
- 11 • Snakebite and Spiderbite Clinical Management Guidelines 2013 -Third Edition Agency for
- 12 Clinical Innovation, NSW Health
- 13 • CNS metastases in women with secondary breast cancer. 2014. Australian Government,
- 14 Cancer Australia
- 15 • General practice management of type 2 diabetes – 2014–15. Melbourne: The Royal
- 16 Australian College of General Practitioners and Diabetes Australia, 2014.
- 17 • KHA-CARI Guideline: Peritonitis treatment and prophylaxis *Nephrology* 19 (2014) 69–71
- 18 • A new blood glucose management algorithm for type 2 diabetes. A position statement of the
- 19 Australian Diabetes Society. *MJA* 201 (11) · 15 December 2014
- 20 • Royal Australian and New Zealand College of Psychiatrists clinical practice guidelines for the
- 21 treatment of eating disorders *Aust N Z J Psychiatry* 2014; 48: 977
- 22 • Clinical Practice Guidelines: Burn Patient Management Agency for Clinical Innovation 2014
- 23 • Motor Accidents Authority: *Guidelines for the management of acute whiplash-associated*
- 24 *disorders – for health professionals*. Sydney: third edition 2014.
- 25
- 26
- 27
- 28
- 29
- 30
- 31
- 32
- 33
- 34
- 35
- 36
- 37
- 38
- 39
- 40
- 41
- 42
- 43
- 44
- 45
- 46
- 47
- 48
- 49
- 50
- 51
- 52
- 53
- 54
- 55
- 56
- 57
- 58
- 59
- 60

# BMJ Open

## Undisclosed financial ties between guideline writers and pharmaceutical companies: a cross-sectional study across ten disease categories

|                                 |                                                                                                                                                                                                                                                                                                                                                                                                                                                                      |
|---------------------------------|----------------------------------------------------------------------------------------------------------------------------------------------------------------------------------------------------------------------------------------------------------------------------------------------------------------------------------------------------------------------------------------------------------------------------------------------------------------------|
| Journal:                        | <i>BMJ Open</i>                                                                                                                                                                                                                                                                                                                                                                                                                                                      |
| Manuscript ID                   | bmjopen-2018-025864.R1                                                                                                                                                                                                                                                                                                                                                                                                                                               |
| Article Type:                   | Research                                                                                                                                                                                                                                                                                                                                                                                                                                                             |
| Date Submitted by the Author:   | 06-Nov-2018                                                                                                                                                                                                                                                                                                                                                                                                                                                          |
| Complete List of Authors:       | Moynihan, Ray; Bond University , CREBP<br>Lai, Alexandra; University of Sydney , Charles Perkins Centre<br>Jarvis, Huw; National Health and Medical Research Council<br>Duggan, Geraint; National Health and Medical Research Council<br>Goodrick, Stephanie; National Health and Medical Research Council<br>Beller, Elaine; Bond University, Centre for Research in Evidence Based Practice<br>Bero, Lisa; University of Sydney, Charles Perkins Centre / Pharmacy |
| <b>Primary Subject Heading</b>: | Health policy                                                                                                                                                                                                                                                                                                                                                                                                                                                        |
| Secondary Subject Heading:      | Public health                                                                                                                                                                                                                                                                                                                                                                                                                                                        |
| Keywords:                       | Protocols & guidelines < HEALTH SERVICES ADMINISTRATION & MANAGEMENT, conflicts of interest, pharmaceutical industry                                                                                                                                                                                                                                                                                                                                                 |
|                                 |                                                                                                                                                                                                                                                                                                                                                                                                                                                                      |

SCHOLARONE™  
Manuscripts

1  
2  
3  
4  
5  
6 **Title:** Undisclosed financial ties between guideline writers and pharmaceutical companies: a  
7 cross-sectional study across ten disease categories  
8  
9

10  
11  
12 **Authors Names:** Ray Moynihan, Alexandra Lai, Huw Jarvis, Geraint Duggan, Stephanie  
13 Goodrick, Elaine Beller, Lisa Bero.  
14  
15

16  
17  
18 **Address for each author:**  
19

20 Centre for Research in Evidence-Based Practice, Bond University, Gold Coast, QLD, 4229,  
21 Australia Ray Moynihan

22 Senior Research Fellow

23 Charles Perkins Centre and Faculty of Pharmacy, The University of Sydney, NSW, 2006,  
24 Australia Alexandra Lai

25 Honours Student

26 National Health and Medical Research Council, Canberra, ACT, 2601

27 Australia Huw Jarvis

28 Senior Project Officer

29 National Health and Medical Research Council, Canberra, ACT, 2601

30 Australia Geraint Duggan

31 Director, Clinical Guidelines

32 National Health and Medical Research Council, Canberra, ACT, 2601

33 Australia Stephanie Goodrick

34 Assistant Director, Clinical Guidelines

35 Centre for Research in Evidence-Based Practice, Bond University, Gold Coast, QLD, 4229,  
36 Australia Elaine M Beller

37 Associate Professor

38 Charles Perkins Centre and Faculty of Pharmacy, The University of Sydney, NSW, 2006,  
39 Australia Lisa Bero

40 Professor  
41  
42  
43  
44  
45  
46  
47  
48  
49  
50  
51  
52  
53

54 Correspondence to R Moynihan raymoynihan@bond.edu.au  
55  
56  
57  
58  
59  
60

## Abstract

**Objectives:** To investigate the proportion of potentially relevant undisclosed financial ties between clinical practice guideline writers and pharmaceutical companies.

**Design:** Cross-sectional study of a stratified random sample of Australian guidelines and writers.

**Setting:** Guidelines available from Australia's National Health and Medical Research Council guideline database, 2012-2014, stratified across ten health priority areas.

**Population:** 402 authors of 33 guidelines, including up to 4 from each area, dependent on availability: arthritis/musculoskeletal(3); asthma(4); cancer(4); cardiovascular(4); diabetes (4); injury(3); kidney/urogenital(4), mental health(4); neurological(1); obesity(1). For guideline writers with no disclosures, or who disclosed no ties, a search of disclosures in the medical literature in the 5 years prior to guideline publication identified potentially relevant ties, undisclosed in guidelines. Guidelines were included if they contained recommendations of medicines, and writers included if developing or writing guidelines.

**Main outcome measures:** Proportions of guideline writers with potentially relevant undisclosed financial ties to pharmaceutical companies active in the therapeutic area; proportion of guidelines including at least one writer with a potentially relevant undisclosed tie.

**Results:** 344 of 402 writers (86%; 95% CI 82% to 89%) either had no published disclosures (228) or disclosed they had no ties (116). Of the 344 with no disclosed ties, 83 (24%; 95% CI, 20% to 29%) had potentially relevant undisclosed ties. Of 33 guidelines, 23 (70%; 95% CI, 51% to 84%) included at least one writer with a potentially relevant undisclosed tie. Writers of guidelines developed and funded by governments were less likely to have undisclosed financial ties (8.1% vs 30.6%; risk ratio 0.26; 95% CI 0.13 to 0.53; P-value <0.001)

**Conclusions:** Almost one in four guideline writers with no disclosed ties may have potentially relevant undisclosed ties to pharmaceutical companies. These data confirm the need for strategies to ensure greater transparency and more independence in relationships between guidelines and industry.

### Strengths and Limitations of this study

- Our study is the largest to date to examine undisclosed ties of guideline writers, and includes a broad sample of guidelines across ten disease categories
- Our study includes guidelines with different funding and development arrangements, enabling comparison of guidelines funded and developed by government, with other guidelines
- Our study did not investigate the undisclosed ties of guideline writers who had disclosed ties in the sample of guidelines analysed
- Study results likely underestimate the extent of undisclosed financial ties of guideline writers

peer review only

## Introduction

There is global concern about the nature and extent of financial ties between pharmaceutical companies and health professionals, including those who develop influential clinical practice guidelines. (1-3) In 2009 a landmark Institute of Medicine report on conflicts of interest acknowledged the importance of collaboration with industry, but warned financial ties to industry were widespread and risked jeopardizing the integrity of medical education, research, and practice, and called for greater transparency and independence. (1) A subsequent Institute of Medicine report, titled “Clinical practice guidelines we can trust”, recommended that groups developing guidelines “optimally comprise members without conflict of interest.” (2) Systematic review evidence suggests most guideline writers disclose some form of industry affiliation, with estimates between 56% and 87%. (3) There are however few data on the extent of undisclosed financial ties of guideline writers. One study of North American cholesterol and diabetes guidelines estimated 11% of writers had undisclosed ties, (4) another study of American head and neck surgery guidelines found 6% had discrepancies between disclosures and an open payments database, (5) while a Danish study of 14 specialty society guidelines found 52% had undisclosed ties. (6) \*

A conflict of interest is defined as “a set of circumstances that creates a risk that professional judgment or actions regarding a primary interest will be unduly influenced by a secondary interest.” (1) A primary interest of a guideline writer may be maximising health outcomes, and a secondary interest could be personal gain derived from a financial relationship with a company active in the relevant therapeutic area. Evidence from other areas, such as clinical trials, has shown such conflicts of interest may introduce bias. A recent systematic review found drug trials sponsored by industry more often have efficacy results and conclusions favourable to the sponsor. (7) Similarly, a cross-sectional study of randomised trials found those authored by principal investigators with ties to pharmaceutical companies were more likely than other trials to report favourable results. (8) Such evidence has provoked debate about the optimum constitution of guideline groups, with calls for chairs and a majority of writers to be free of financial ties, (9,10) as well as recommendations for exclusion of any conflicted writer. (2)

*\*For consistency the term guideline writer is used throughout to refer to those who develop, draft and author guidelines.*



1  
2  
3 In Australia, the publicly funded National Health and Medical Research Council (NHMRC)  
4 is currently engaged in improving standards for guideline development, including in relation  
5 to transparency and management of conflicts of interest. An internal analysis of nine years of  
6 Australian guidelines made available via the NHMRC guideline portal, 2005-2013, found  
7 only 12% of guidelines published declarations of the conflicts of interest of guideline writers.  
8  
9 (11) As part of work to improve standards of guidelines which can have direct impacts on  
10 how clinicians deliver care to their patients, the NHMRC is developing new “guidelines for  
11 guidelines”, and a draft released for public comment in 2017 included the recommendation:  
12 “Organisations planning guidelines should aim to appoint a guideline development group  
13 whose members have no financial or other links with relevant industry groups.” (12) In order  
14 to inform on-going efforts to improve guideline quality in Australia and internationally, our  
15 objective was to investigate the extent of undisclosed financial ties to industry, for a broad  
16 cross-section of guideline writers from different categories of guideline developer, sampled  
17 from a comprehensive national guideline database, across a wide spectrum of diseases.  
18  
19  
20  
21  
22  
23  
24  
25  
26  
27  
28

## 29 **Methods**

30  
31 We conducted a cross-sectional study of a stratified random sample of Australian clinical  
32 practice guidelines and followed the STROBE checklist for reporting observational studies.  
33 (see Supplementary file 1) (13)  
34  
35  
36

### 37 *Sampling guidelines*

38  
39 We identified a stratified random sample of clinical practice guidelines from within the  
40 NHMRC guidelines database, across nine government designated health priority areas,  
41 (<https://nhmrc.gov.au/about-us/publications/nhmrc-corporate-plan-2017-2018>) plus  
42 kidney/urogenital, published in the years 2012-2014. The NHMRC database comprised  
43 guidelines made available on the publicly accessible NHMRC guidelines portal, which aimed  
44 to include all Australian guidelines, defined broadly as published articles making clinical  
45 recommendations. While the NHMRC portal at that time included all Australian guidelines, it  
46 also provided users of the portal with information on quality indicators for these guidelines,  
47 such as whether the guideline was based on a systematic review of evidence, whether the  
48 authors provided conflict of interest disclosures, and whether or not the guideline had been  
49 approved by NHMRC. From 2015, the NHMRC portal restricted the inclusion of guidelines  
50 to only include guidelines which met certain quality standards, so to achieve a representative  
51  
52  
53  
54  
55  
56  
57  
58  
59  
60

1  
2  
3 sample from the comprehensive collection of widely used Australian guidelines, we analysed  
4 guidelines available on the portal in the three years leading up to the change.  
5  
6

7 In 2017 NHMRC staff (HJ) identified all guidelines in the database, published in the years  
8 2012-2014, and used previous coding by NHMRC to exclude articles not relevant to the ten  
9 health areas of interest, those not considered guidelines, including those coded as Evidence  
10 Reviews, Posters/Flowcharts, Standards, and Summary guidelines. Following the initial  
11 screen, each guideline was randomly ordered using Microsoft Excel, within each of the ten  
12 health areas. Two authors (LB, RM) then assessed each guideline in the order they had been  
13 ranked, against explicit inclusion criteria, and identified guideline writers to be included in  
14 the analysis. Guidelines were included if they were associated with a professional  
15 organisation or entity and made mention of medicines in recommendations. They were  
16 excluded if they were a journal article unconnected from an external organisation, or if no  
17 author names or full text was available. Guideline writers listed in the guideline were  
18 included for analysis if they were explicitly engaged in developing, preparing or writing the  
19 guideline, and excluded if they were external consultants, members of oversight committees,  
20 or staff from a drug company, NHMRC, or administrative staff. Any discrepancies were  
21 resolved by discussion.  
22  
23  
24  
25  
26  
27  
28  
29  
30  
31  
32

33  
34 The primary unit of analysis was the guideline writer. Based on assumptions that 10% of  
35 guideline writers might have an undisclosed relevant financial tie, and that guidelines would  
36 have 4-20 writers each, we estimated a need for a minimum sample of 12 guidelines – aiming  
37 for approximately 140 writers – to produce a confidence interval of a width of 10% around  
38 our estimate of the proportion of writers with undisclosed ties. In addition, to obtain as broad  
39 a cross-section as possible, we aimed to analyse up to four guidelines per health  
40 priority/disease area, depending on guideline availability.  
41  
42  
43  
44  
45  
46

#### 47 *Guideline and author information*

48

49 One investigator (either AL or RM) extracted all relevant information from each included  
50 guideline into the REDCap electronic data capture tools hosted at the University of Sydney.  
51 (14) The extracted information included the names of all included writers, classified in one  
52 of three ways: disclosure of ties; disclosure of no ties; no disclosure present. Disclosures  
53 were those included in the guideline document or associated publicly available documents.  
54 Information on whether the guideline had a statement on conflicts of interest, and the  
55 developer/s and funder/s was also extracted.  
56  
57  
58  
59  
60

### *Identification of potentially relevant undisclosed financial ties*

For any guideline writer with no declaration present, or who declared no conflicts of interests, one investigator (AL or RM) conducted a search of the writer's publications in the five years before the year of guideline publication. The period of five years was chosen for the following reasons: many guidelines are estimated to be at least two years in development before the year of publication; disclosures are directly relevant at the start of the process of guideline development; World Health Organization guidance suggests a period of 4 years prior to publication is relevant when disclosing financial ties, (15); and many disclosure policies have a recall period of 3 to 5 years. (16) Publications were also searched in the three years following guideline publication, as some organisations, including the Institute of Medicine, recommend guideline writers be free of conflicts for periods of time after guideline publication. (17)

The Scopus database was used to search for publications of guideline writers using their names and affiliations. Full texts were obtained. Searches were conducted from the earliest date, and as per Forsyth et al. (18) were stopped once a potentially relevant financial tie was identified. A potentially relevant tie was defined as a financial tie to a pharmaceutical company actively marketing or in late stages of bringing a medicine to market in the therapeutic area relevant to the guideline, at the time of the guideline publication, determined through searches of company websites and relevant product information material. Categorisation of ties was developed based on criteria set by the International Committee of Medical Journal Editors, ICMJE, and based on adaptations of ICMJE criteria used in a previous study, (18) including: grants (funding for research study); personal fees (consulting, advisory, speakers, honoraria, travel); patents/copyrights/royalties; miscellaneous. Once a potentially relevant tie was identified by one author (AL or RM), a second author (RM or LB) double checked the full text of the disclosure and verified the tie as a potentially relevant tie, and any discrepancies were resolved by discussion. Searches were conducted between August and December 2017.

### *Outcome measures and statistical analysis*

The primary outcome measures were specified as the proportion of guideline writers with potentially relevant undisclosed ties, and the proportion of guidelines in the sample which included at least one writer with an undisclosed tie. Secondary outcome measures were: the proportion of writers with disclosed ties; the proportion of guidelines which have any

1  
2  
3 statement about conflicts of interest; and the proportion of guidelines developed and funded  
4 by governments (state, federal or territories). We report data proportions using descriptive  
5 statistics and including 95% confidence intervals. We examined the association between  
6 having statements and the proportion of potentially relevant undisclosed ties of writers; and  
7 the association between a guideline being developed and funded by government/s and the  
8 proportion of potentially relevant undisclosed ties of writers. Potential associations were  
9 tested using the chi-square test. Confidence intervals were not adjusted for clustering of  
10 writers within multiple guidelines, or for clustering of guidelines within disease area.  
11  
12  
13  
14  
15  
16

### 17 *Ethics*

18  
19  
20 As all publications analysed for this study were on the public record, the chair of Bond  
21 University's Human Research Ethics committee asserted that the study did not require ethics  
22 review, if no individuals were identified or described.  
23  
24  
25

### 26 *Patient and Public Involvement*

27  
28  
29 No patients or members of the public were involved in this study.  
30

## 31 **Results**

### 32 *Characteristics of Guidelines*

33  
34  
35  
36 There was a total of 347 guidelines in the NHMRC database, published 2012-2014. (Figure  
37 1) The initial screen excluded 11 items not considered guidelines, coded by NHMRC as  
38 Evidence Reviews, Posters/Flowcharts, Standards, and Summary guidelines, 62 because they  
39 did not contain names of those who had developed the guideline and 129 published outside  
40 the ten health areas in this study. The remaining 145 guidelines were assigned a random  
41 number to establish a random order for assessment of the guidelines within each of the ten  
42 health areas. We continued to assess guidelines within each area in random order until we had  
43 included 4 for each health area or had completed assessing all the available guidelines in a  
44 given health area. In total, LB and RM assessed 82 guidelines. Forty-nine of those  
45 guidelines were excluded after assessment: because they were a publication only with no  
46 affiliation to any external organisation (n=22); had no recommendations about medications  
47 (n=25); or the full text or author list of the guideline was not publicly available. (n=2) Sixty-  
48 three were not assessed.  
49  
50  
51  
52  
53  
54  
55  
56  
57  
58  
59  
60

1  
2  
3 We included 33 guidelines in our final sample: arthritis/musculoskeletal(n=3); asthma(n=4);  
4 cancer(n=4); cardiovascular(n=4); diabetes (n=4); injury(n=4); mental health(n=4);  
5 neurological(n=1); obesity(n=1); kidney/urogenital(n=4). (Supplementary file 2) The 33  
6 guidelines involved a total of 402 guideline writers, with individual guidelines having  
7 between 2 and 35 writers included for analysis.  
8  
9

### 10 11 12 *Prevalence of undisclosed ties*

13  
14  
15 Among all 402 guideline writers, 58 disclosed ties. (14%; 95% CI, 11% to 18%)(Table 1)  
16 Among the 402 writers, 344 had no disclosed ties, (86%; 95% CI 82% to 89%) including 228  
17 writers where no disclosures appeared, and 116 writers with statements that they had no ties.  
18 Of the 344 writers with no disclosed ties, 83 had at least one potentially relevant undisclosed  
19 tie, (24%; 95% CI, 20% to 29%), discovered in the published literature in the same year as  
20 the guideline was published or the previous 5 years. Of those undisclosed ties, the first  
21 category of tie listed in the relevant disclosure was: pharmaceutical company grant (64%), or  
22 personal fees, (36%). If the time frame was extended to 3 years after the guideline, the  
23 proportion of potentially relevant undisclosed ties rose from 24% to 28%. (95% CI, 23% to  
24 33%)  
25  
26

27  
28  
29 Of 33 guidelines, 23 included at least one writer with a potentially relevant undisclosed tie.  
30 (70%; 95% CI, 51% to 84%). (Figure 2) Of those 23 guidelines, 14 guidelines had 20% or  
31 more writers who disclosed no ties, but had potentially relevant undisclosed ties. Figure 2  
32 also reveals the proportion of undisclosed ties of guideline writers who disclosed no ties, per  
33 guideline, grouped by disease category.  
34  
35  
36  
37  
38  
39  
40  
41

### 42 43 *Guideline Characteristics and Undisclosed Ties*

44  
45 Guidelines which included any statement about conflicts of interest were not significantly  
46 different from those without statements, 59 of 223 writers (27%) had potentially relevant  
47 undisclosed ties, compared to 24 of 121 writers. (20%) (risk ratio 1.33; 95% CI 0.88 to 2.03;  
48 P-value =0.170) (Table 2) Guidelines both developed and funded by governments, as  
49 opposed to non-government groups (including professional bodies, foundations, or  
50 pharmaceutical companies), were significantly less likely to have authors with potentially  
51 relevant undisclosed ties, 8 of 99 writers (8%) compared to 75 of 245 writers. (31%) (risk  
52 ratio 0.26; 95% CI 0.13 to 0.53; P-value <0.001)  
53  
54  
55  
56  
57  
58  
59

## 60 **Discussion**

1  
2  
3 In this broad cross-sectional sample of Australian clinical practice guidelines, 14% of  
4 guideline writers had published disclosures of conflicts of interest. Among those who either  
5 had no disclosures or disclosed they had no conflicts, 24% – almost one in four – had at least  
6 one potentially relevant undisclosed financial tie to a pharmaceutical company active in the  
7 therapeutic area. More than two-thirds, or 70%, of the 33 guidelines in this sample had at  
8 least one writer with an undisclosed tie. Undisclosed financial ties of guideline writers  
9 appeared to be more common in some therapeutic areas such as diabetes and cardiovascular  
10 disease, compared to other areas such as injury and mental health. Guideline writers working  
11 on guidelines developed and funded by government were much less likely to have  
12 undisclosed financial ties: 8% compared to 31%.

21  
22 There are important limitations to this study. First, the results likely underestimate the  
23 frequency of undisclosed ties for several reasons: there is a general under-reporting of ties  
24 published in medical journals as many important transfers of benefits to professionals, such  
25 as hospitality or industry-subsidised education, are not routinely disclosed; Australia did not  
26 at the time have a database with information on company payments to individuals; and we  
27 did not search for any potentially relevant undisclosed ties of writers who made disclosures of  
28 ties in the guideline, whether those ties were to pharmaceutical companies or other groups.  
29 Second, our results may tend to a small degree to overestimate the frequency of undisclosed  
30 ties, through what some may see as a broad definition of potential relevance; for example,  
31 categorising a co-investigator of a study funded by a pharmaceutical company active in the  
32 therapeutic area as a potentially relevant tie. Third, the sample of guidelines, while broad and  
33 accessible, comes from 2012-2014 – the most recent years available for this sample from a  
34 comprehensive collection – admitting the possibility of change since that time. And fourth,  
35 we looked only at financial ties, not other non-financial conflicts of interest. The strengths of  
36 the study lie in it being the largest to date in terms of guideline writers and undisclosed ties to  
37 industry, as well as covering a broad cross-section of disease categories and guideline  
38 developers – both government and non-government – with previous smaller studies limited to  
39 specific therapeutic areas, (4,5) or guidelines produced only by specialty societies. (6)

41  
42 Neuman and colleagues investigated the prevalence of conflicts of interest among panels  
43 producing 14 North American guidelines for high cholesterol and diabetes. (4) They reported  
44 that among writers who formally declared no conflicts, 11% had one or more. Looking at a  
45 small sample of 49 writers of head and neck surgery guidelines, Horn and colleagues found

1  
2  
3 6% had discrepancies between guideline disclosures and information available in the Open  
4 Payments transparency database. (5) Analysing Danish specialty society guidelines, and  
5 cross-checking disclosures against a public register of disclosures, Bindsley and colleagues  
6 estimated 52% of 254 guideline writers had not disclosed ties. (6) A possible explanation of  
7 why our estimate of 24% sits within these finding is that the North American studies used  
8 narrower timeframes to search for undisclosed ties, while the Danish study defined a conflict  
9 of interest as any affiliation with any drug company.

10  
11  
12  
13  
14  
15  
16  
17 As others have stated, guideline writer ties to companies with interest in the guideline's  
18 outcome raise critical questions about potential bias in processes that may have great impacts  
19 on the use of healthcare interventions, (4,12) disease definitions, (19) and patient care.  
20 Findings of potentially relevant undisclosed ties compound the problem further and raise the  
21 spectre of hidden bias, increasing the wariness of guideline users. Contemporary community  
22 standards now demand total transparency, and our findings of undisclosed ties add weight to  
23 calls for reforms like the Sunshine Act and Open Payments system in the United States, (20)  
24 "publicly accessible registries of researcher conflicts of interest", (21) and more immediately,  
25 enforcement of current disclosure policies to minimise undisclosed ties. In line with repeated  
26 recommendations for greater independence between health professionals and industry,  
27 (1,2,12) our incidental finding that almost one in five of these guidelines had less than 10% of  
28 writers with any ties to industry, shows it is possible to assemble guideline panels almost  
29 entirely free of financial conflicts of interest.

30  
31  
32  
33  
34  
35  
36  
37  
38  
39  
40  
41 The related reform processes of enhanced transparency and greater independence underway  
42 in many nations creates clear opportunities for research comparing the quality of guidelines  
43 developed by writers with and without links to industry, a research question beyond the scope  
44 of this study, and where there is currently limited data. (22) Similarly, there is need for more  
45 research investigating the impacts of links between industry and the professional  
46 organisations which auspice guideline development, with one recent study suggesting such  
47 ties are "common and infrequently disclosed." (23) Given their potential influence over  
48 human health, and health system sustainability, such vital research on the independence and  
49 trustworthiness of guidelines will be greatly enhanced by complete transparency around the  
50 financial conflicts of interest of those developing them.

1  
2  
3  
4  
5 **Acknowledgements:** We would like to thank Edward Luca, who helped develop the search  
6 for guideline writer publications.  
7  
8  
9

---

### 10 11 **Copyright/license for publication:**

12  
13  
14  
15 The Corresponding Author has the right to grant on behalf of all authors and does grant on  
16 behalf of all authors, a worldwide licence to the Publishers and its licensees in perpetuity, in  
17 all forms, formats and media (whether known now or created in the future), to i) publish,  
18 reproduce, distribute, display and store the Contribution, ii) translate the Contribution into  
19 other languages, create adaptations, reprints, include within collections and create summaries,  
20 extracts and/or, abstracts of the Contribution, iii) create any other derivative work(s) based on  
21 the Contribution, iv) to exploit all subsidiary rights in the Contribution, v) the inclusion of  
22 electronic links from the Contribution to third party material where-ever it may be located;  
23 and, vi) licence any third party to do any or all of the above.  
24  
25  
26  
27  
28  
29  
30  
31

### 32 **Conflicts of Interest:**

33  
34 Competing interests: All authors have completed the ICMJE uniform disclosure form  
35 at [www.icmje.org/coi\\_disclosure.pdf](http://www.icmje.org/coi_disclosure.pdf) and declare: RM and EB have received grant support  
36 from NHMRC; LB is a member of the NHMRC committee developing the guidelines for  
37 guidelines handbook.  
38  
39  
40  
41

### 42 **Contributor Statement:**

43  
44 RM, AL, HJ, GD, SG, LB conceived and designed the study. RM and LB supervised the  
45 study. RM, AL, EB, LB analysed the data. RM, AL, HJ, GD, SG, EB, LB interpreted the  
46 data. RM wrote the first draft of the manuscript, and RM, AL, HJ, GD, SG, EB, LB were  
47 involved in revisions of manuscript.  
48  
49  
50  
51  
52  
53

### 54 **Contributor and guarantor information:**

55  
56 All authors contributed to the planning, conduct and reporting of this study, and RM and LB  
57 are guarantors.  
58  
59  
60



**Data Sharing Statement:**

We will share data where possible, within confines of guidance from Bond University Ethics Committee that the paper does not identify or describe any individuals.

**Transparency Declaration:**

The lead author affirms that the manuscript is an honest, accurate, and transparent account of the study being reported; that no important aspects of the study have been omitted; and that any discrepancies from the study as originally planned have been explained.

**Funding source:**

RM is supported by a research fellowship funded by NHMRC, GNT1124207; HJ was an employee of NHMRC; SG and GD are employees of NHMRC. EB is supported by grants from NHMRC to the Centre for Research in Evidence-Based Practice, Bond University. LB is an employee of The University of Sydney and had no funding specifically for this work. All authors had full access to all data and can take responsibility for the integrity of the data and the accuracy of the data analysis.

**Supplementary File 1:** Strobe checklist (attached)

**Figure 1. Flowchart for sample**

**Figure 2: Proportion of Australian clinical practice guideline writers with undisclosed ties, 2012-2014**

**Table 1. Characteristics of guideline writers from a stratified random sample of guidelines, 2012-2014. (n=33)**

| Therapeutic area | Clinical practice guideline (ID #) | Total number of writers | No. with disclosed ties | Number with no disclosed ties | COI statement available | Developed & funded by government |
|------------------|------------------------------------|-------------------------|-------------------------|-------------------------------|-------------------------|----------------------------------|
| Arthritis        | 1                                  | 15                      | 0                       | 15                            | Yes                     | No                               |
|                  | 2                                  | 26                      | 2                       | 24                            | Yes                     | No                               |
|                  | 3                                  | 6                       | 0                       | 6                             | No                      | Yes                              |
| Asthma           | 4                                  | 14                      | 0                       | 14                            | No                      | Yes                              |
|                  | 5                                  | 7                       | 0                       | 7                             | No                      | No                               |
|                  | 6                                  | 6                       | 0                       | 6                             | No                      | No                               |
|                  | 7                                  | 6                       | 4                       | 2                             | Yes                     | No                               |
| Cancer           | 8                                  | 27                      | 4                       | 23                            | Yes                     | No                               |
|                  | 9                                  | 6                       | 1                       | 5                             | Yes                     | No                               |
|                  | 10                                 | 14                      | 0                       | 14                            | Yes                     | Yes                              |
|                  | 11                                 | 31                      | 0                       | 31                            | No                      | Yes                              |
| Cardio-vascular  | 12                                 | 11                      | 4                       | 7                             | Yes                     | No                               |
|                  | 13                                 | 4                       | 0                       | 4                             | No                      | No                               |
|                  | 14                                 | 8                       | 1                       | 7                             | Yes                     | No                               |
|                  | 15                                 | 34                      | 0                       | 34                            | Yes                     | No                               |
| Diabetes         | 16                                 | 4                       | 0                       | 4                             | No                      | No                               |
|                  | 17                                 | 14                      | 0                       | 14                            | No                      | No                               |
|                  | 18                                 | 5                       | 5                       | 0                             | Yes                     | No                               |
|                  | 19                                 | 13                      | 0                       | 13                            | Yes                     | No                               |
| Injury           | 20                                 | 18                      | 0                       | 18                            | No                      | Yes                              |
|                  | 21                                 | 2                       | 0                       | 2                             | No                      | Yes                              |
|                  | 22                                 | 35                      | 4                       | 31                            | Yes                     | No                               |
|                  | 23                                 | 9                       | 0                       | 9                             | Yes                     | Yes                              |
| Kidney           | 24                                 | 7                       | 1                       | 6                             | Yes                     | No                               |
|                  | 25                                 | 9                       | 2                       | 7                             | Yes                     | No                               |
|                  | 26                                 | 6                       | 2                       | 4                             | Yes                     | No                               |

|               |       |     |    |     |     |     |
|---------------|-------|-----|----|-----|-----|-----|
|               | 27    | 13  | 0  | 13  | No  | No  |
| Mental Health | 28    | 10  | 10 | 0   | Yes | Yes |
|               | 29    | 11  | 11 | 0   | Yes | Yes |
|               | 30    | 9   | 0  | 9   | Yes | No  |
|               | 31    | 8   | 0  | 8   | Yes | No  |
| Neurological  | 32    | 2   | 0  | 2   | No  | No  |
| Obesity       | 33    | 12  | 7  | 5   | Yes | Yes |
|               | Total | 402 | 58 | 344 |     |     |

**Table 2. Proportion of guidelines writers with undisclosed financial ties by guideline type.**

|                                          | Yes                   | No                    | Risk ratio (95% CI)        | P-value          |
|------------------------------------------|-----------------------|-----------------------|----------------------------|------------------|
| <b>COI Statement in Guideline</b>        | <b>59/223 (26.5%)</b> | <b>24/121 (19.8%)</b> | <b>1.33 (0.88 to 2.03)</b> | <b>0.170</b>     |
| <b>Developed, funded by government/s</b> | <b>8/99 (8.1%)</b>    | <b>75/245 (30.6%)</b> | <b>0.26 (0.13 to 0.53)</b> | <b>&lt;0.001</b> |

Note: p value refers to chi-square test

## References

1. Lo B, Field MJ. *Conflict of Interest in Medical Research, Education, and Practice*. Editors: Institute of Medicine (US) Committee on Conflict of Interest in Medical Research, Education, and Practice. Washington (DC): National Academies Press (US); 2009.
2. Institute of Medicine. *Clinical Practice Guidelines We Can Trust*, Report Brief; Washington, D.C.: The National Academies Press; 2011.
3. Norris SL, Holmer HK, Ogden LA, et al. Conflict of Interest in Clinical Practice Guideline Development: A Systematic Review. *PLoS One* 2011; 6(10): e25153.
4. Neuman J, Korenstein D, Ross JS, et al. Prevalence of financial conflicts of interest among panel members producing clinical practice guidelines in Canada and United States: cross sectional study. *BMJ* 2011;343:d5621.
5. Horn J, Checketts JX, Jawhar O, et al. Evaluation of Industry Relationships Among Authors of Otolaryngology Clinical Practice Guidelines. *JAMA Otolaryngol Head Neck Surg* Published online January 4, 2018.
6. Bindsley JB, Schroll J, Gøtzsche P, et al. Underreporting of conflicts of interest in clinical practice guidelines: cross sectional study. *BMC Med Ethics* 2013;14:19.
7. Lundh A, Lexchin J, Mintzes B, et al. Industry Sponsorship and research outcome *Cochrane Database of Systematic Reviews*, First Published 16 February 2017.
8. Ahn R, Woodbridge A, Abraham A, et al. Financial ties of principal investigators and randomized controlled trial outcomes: cross sectional study. *BMJ* 2017;356:i6770.
9. Guyatt G, Akl EA, Hirsh J, et al. The vexing problem of guidelines and conflict of interest: a potential solution. *Ann Intern Med* 2010;152(11):738-41.
10. Handbook for Guideline Development, WHO 2<sup>nd</sup> ed, Geneva, 2014
11. National Health and Medical Research Council. 2014 Annual Report on Australian Clinical Practice Guidelines. Canberra: National Health and Medical Research Council; 2014.
12. National Health and Medical Research Council. Identifying and managing conflicts of interest. NHMRC Public Consultation Version, October 30, 2017. Available at <https://consultations.nhmrc.gov.au/files/consultations/drafts/identifyingandmanagingconflictsofinterest.pdf> Accessed April 12, 2018
13. STROBE Statement—Checklist of items that should be included in reports of cross-sectional studies Available at <https://www.strobe->

- 1  
2  
3 [statement.org/fileadmin/Strobe/uploads/checklists/STROBE\\_checklist\\_v4\\_cross-](http://statement.org/fileadmin/Strobe/uploads/checklists/STROBE_checklist_v4_cross-sectional.pdf)  
4 [sectional.pdf](http://statement.org/fileadmin/Strobe/uploads/checklists/STROBE_checklist_v4_cross-sectional.pdf) Accessed April 12, 2018  
5  
6  
7 14. Harris PA, Taylor R, Thielke R, et al. Research electronic data capture (REDCap)—A  
8 metadata-driven methodology and workflow process for providing translational  
9 research informatics support. *J Biomed Informatics* 2009;42(2):377-81.  
10  
11 15. World Health Organization. WHO Conflict of Interest Guidelines. Declaration of  
12 interests for WHO experts. 2010. Available at <http://keionline.org/node/1062>  
13 Accessed April 12, 2018.  
14  
15 16. Boyd EA, Bero LA. Improving the use of research evidence in guideline  
17 development: 4. Managing conflicts of interests, *Health Research Policy and Systems*  
18 2006; 4: 16  
19  
20 17. Institute of Medicine, Board on Health Care Services, Committee on Standards for  
21 Developing Trustworthy Clinical Practice guidelines. *Clinical Practice Guidelines we*  
22 *can trust*. Washington, DC, National Academies Press; 2011.  
23  
24 18. Forsyth S, Odierna D, Krauth D et al. Conflicts of interest and critiques of the use of  
25 systematic reviews in policymaking: an analysis of opinion articles. *Systematic*  
26 *Reviews* 2014;3:122.  
27  
28 19. Moynihan RN, Cooke GPE, Doust JA, et al. Expanding Disease Definitions in  
29 Guidelines and Expert Panel Ties to Industry: A Cross-sectional Study of Common  
30 Conditions in the United States. *PLoS Med* 2013;10(8): e1001500.  
31  
32 20. Centres for Medicare & Medicaid Services, Open Payments database. Available at  
33 <https://www.cms.gov/openpayments/> Accessed April 12, 2018.  
34  
35 21. Dunn AG, Coiera E, Mandl KD, et al. Conflict of interest disclosure in biomedical  
36 research: A review of current practices, biases, and the role of public registries in  
37 improving transparency. *Res Integr Peer Rev* 2019;1.Pii:1 Epub 2016 May 3.  
38  
39 22. Cosgrove L, Bursztajn HJ, Erlich DR, et al. Conflicts of interest and the quality of  
40 recommendations in clinical guidelines. *J Eval Clin Pract* 2013 Aug;19(4):674-81.  
41  
42 23. Campsall P, Colizza K, Straus S, Stelfox HT. Financial Relationships between  
43 Organizations That Produce Clinical Practice Guidelines and the Biomedical Industry:  
44 A Cross-Sectional Study. *PLoS Med* 2016;13(5):e1002029.  
45  
46  
47  
48  
49  
50  
51  
52  
53  
54  
55  
56  
57  
58  
59  
60



Figure 1. Flowchart for sample

88x90mm (300 x 300 DPI)

1  
2  
3  
4  
5  
6  
7  
8  
9  
10  
11  
12  
13  
14  
15  
16  
17  
18  
19  
20  
21  
22  
23  
24  
25  
26  
27  
28  
29  
30  
31  
32  
33  
34  
35  
36  
37  
38  
39  
40  
41  
42  
43  
44  
45  
46  
47  
48  
49  
50  
51  
52  
53  
54  
55  
56  
57  
58  
59  
60



Figure 2. Proportion of Australian clinical practice guideline writers with undisclosed ties, 2012-2014  
90x39mm (300 x 300 DPI)

STROBE Statement—Checklist of items that should be included in reports of *cross-sectional studies* (Page numbers refer to those on original submitted word document)

For manuscript: “Undisclosed financial ties between guideline writers and pharmaceutical companies: a cross-sectional study across ten disease categories”, submitted by Moynihan et al., 060818

|                              | Item No | Recommendation                                                                                                                                                                                      | Item page nr      |
|------------------------------|---------|-----------------------------------------------------------------------------------------------------------------------------------------------------------------------------------------------------|-------------------|
| <b>Title and abstract</b>    | 1       | (a) Indicate the study’s design with a commonly used term in the title or the abstract                                                                                                              | 1                 |
|                              |         | (b) Provide in the abstract an informative and balanced summary of what was done and what was found                                                                                                 | 2                 |
| <b>Introduction</b>          |         |                                                                                                                                                                                                     |                   |
| Background/rationale         | 2       | Explain the scientific background and rationale for the investigation being reported                                                                                                                | 3                 |
| Objectives                   | 3       | State specific objectives, including any prespecified hypotheses                                                                                                                                    | 4                 |
| <b>Methods</b>               |         |                                                                                                                                                                                                     |                   |
| Study design                 | 4       | Present key elements of study design early in the paper                                                                                                                                             | 4                 |
| Setting                      | 5       | Describe the setting, locations, and relevant dates, including periods of recruitment, exposure, follow-up, and data collection                                                                     | 4-6               |
| Participants                 | 6       | (a) Give the eligibility criteria, and the sources and methods of selection of participants                                                                                                         | 4-5               |
| Variables                    | 7       | Clearly define all outcomes, exposures, predictors, potential confounders, and effect modifiers. Give diagnostic criteria, if applicable                                                            | 5-6               |
| Data sources/<br>measurement | 8*      | For each variable of interest, give sources of data and details of methods of assessment (measurement). Describe comparability of assessment methods if there is more than one group                | 4-6               |
| Bias                         | 9       | Describe any efforts to address potential sources of bias                                                                                                                                           | N/A               |
| Study size                   | 10      | Explain how the study size was arrived at                                                                                                                                                           | 5                 |
| Quantitative variables       | 11      | Explain how quantitative variables were handled in the analyses. If applicable, describe which groupings were chosen and why                                                                        | 6                 |
| Statistical methods          | 12      | (a) Describe all statistical methods, including those used to control for confounding                                                                                                               | 6                 |
|                              |         | (b) Describe any methods used to examine subgroups and interactions                                                                                                                                 | 6                 |
|                              |         | (c) Explain how missing data were addressed                                                                                                                                                         | N/A               |
|                              |         | (d) If applicable, describe analytical methods taking account of sampling strategy                                                                                                                  | N/A               |
|                              |         | (e) Describe any sensitivity analyses                                                                                                                                                               | N/A               |
| <b>Results</b>               |         |                                                                                                                                                                                                     |                   |
| Participants                 | 13*     | (a) Report numbers of individuals at each stage of study – eg numbers potentially eligible, examined for eligibility, confirmed eligible, included in the study, completing follow-up, and analysed | 7 (plus Figure 1) |
|                              |         | (b) Give reasons for non-participation at each stage                                                                                                                                                | 7 (plus Figure 1) |
|                              |         | (c) Consider use of a flow diagram                                                                                                                                                                  | Figure 1          |
| Descriptive data             | 14*     | (a) Give characteristics of study participants (eg demographic, clinical, social) and information on exposures and potential confounders                                                            | 7                 |
|                              |         | (b) Indicate number of participants with missing data for each variable of interest                                                                                                                 | N/A               |
| Outcome data                 | 15*     | Report numbers of outcome events or summary measures                                                                                                                                                | 7-8               |



|    |                          |    |                                                                                                                                                                                                              |      |
|----|--------------------------|----|--------------------------------------------------------------------------------------------------------------------------------------------------------------------------------------------------------------|------|
| 1  | Main results             | 16 | (a) Give unadjusted estimates and, if applicable, confounder-adjusted estimates and their precision (eg. 95% confidence interval). Make clear which confounders were adjusted for and why they were included | 7-8  |
| 2  |                          |    | (b) Report category boundaries when continuous variables were categorized                                                                                                                                    | N/A  |
| 3  |                          |    | (c) If relevant, consider translating estimates of relative risk into absolute risk for a meaningful time period                                                                                             | N/A  |
| 4  | Other analyses           | 17 | Report other analyses done – eg analyses of subgroups and interactions, and sensitivity analyses                                                                                                             | 8    |
| 5  | <b>Discussion</b>        |    |                                                                                                                                                                                                              |      |
| 6  | Key results              | 18 | Summarise key results with reference to study objectives                                                                                                                                                     | 8-9  |
| 7  | Limitations              | 19 | Discuss limitations of the study, taking into account sources of potential bias or imprecision. Discuss both direction and magnitude of any potential bias                                                   | 9    |
| 8  | Interpretation           | 20 | Give a cautious overall interpretation of results considering objectives, limitations, multiplicity of analyses, results from similar studies, and other relevant evidence                                   | 9-10 |
| 9  | Generalisability         | 21 | Discuss the generalisability (external validity) of the study results                                                                                                                                        | 9-10 |
| 10 | <b>Other information</b> |    |                                                                                                                                                                                                              |      |
| 11 | Funding                  | 22 | Give the source of funding and the role of the funders for the present study and, if applicable, for the original study on which the present article is based                                                | 12   |

\*Give information separately for exposed and unexposed groups.

**Note:** An Explanation and Elaboration article discusses each checklist item and gives methodological background and published examples of transparent reporting. The STROBE checklist is best used in conjunction with this article (freely available on the Web sites of PLoS Medicine at <http://www.plosmedicine.org/>, Annals of Internal Medicine at <http://www.annals.org/>, and Epidemiology at <http://www.epidem.com/>). Information on the STROBE Initiative is available at [www.strobe-statement.org](http://www.strobe-statement.org).

## List of Guidelines

- Agency for Clinical Innovation, NSW Health. Evidence-based review for patients undergoing elective hip and knee replacement. *ANZ J Surg* 84 (2014) 17–24
- Osteoporosis Australia Building healthy bones throughout life: an evidence-informed strategy to prevent osteoporosis in Australia *MJA Open*, 2 Suppl 1, 4 February 2013
- 2013. Clinical Practice Guidelines for the Management of Rotator Cuff Syndrome in the Workplace. The University of New South Wales.
- 2012 Clinical Practice Guidelines for the acute treatment of infants and children with asthma. (NSW Health)
- National Asthma Council Australia. *Asthma and the Over 65s- An information paper for health professionals*. Melbourne, National Asthma Council Australia, 2013.
- National Asthma Council Australia. *Asthma and Healthy Living. An information paper for health professionals*. Melbourne, National Asthma Council Australia, 2013.
- Australian Asthma Handbook Version 1, 2014 (National Asthma Council of Australia)
- Chronic Kidney Disease Management in General Practice. 2<sup>nd</sup> Ed 2012 Kidney Health Australia
- National Vascular Disease Prevention Alliance. Guidelines for the management of absolute cardiovascular disease risk. 2012.
- Australian Wound Management Association. Pan Pacific Clinical Practice Guideline for the Prevention and Management of Pressure Injury. Cambridge Media Osborne Park, WA: 2012.
- National Heart Foundation of Australia and the Cardiac Society of Australia and New Zealand. Reducing risk in heart disease: an expert guide to clinical practice for secondary prevention of coronary heart disease. Melbourne: National Heart Foundation of Australia, 2012.
- PERI-OPERATIVE DIABETES MANAGEMENT GUIDELINES AUSTRALIAN DIABETES SOCIETY July 2012
- Position Paper on Hereditary Angioedema Australasian Society of Clinical Immunology and Allergy 2012
- Australian and New Zealand Society for Geriatric Medicine. Position Statement 13. Delirium in Older People Revised 2012
- National Health and Medical Research Council (2012). *Clinical Practice Points on the diagnosis, assessment and management of Attention Deficit Hyperactivity Disorder in children and adolescents*. Commonwealth of Australia.
- Baker IDI Heart and Diabetes Institute. Type 2 diabetes in young Indigenous Australians in rural and remote areas: diagnosis, screening, management and prevention *MJA* 197 (1), 2 July 2012
- Endometriosis and Infertility – a consensus statement from ACCEPT (Australasian CREI Consensus Expert Panel on Trial evidence). *Australian and New Zealand Journal of Obstetrics and Gynaecology* 2012; 52: 513–522
- National Health and Medical Research Council. *Clinical Practice Guideline for the Management of Borderline Personality Disorder*. Melbourne: National Health and Medical Research Council; 2012.
- National Health and Medical Research Council (2013) Clinical practice guidelines for the management of overweight and obesity in adults, adolescents and children in Australia. Melbourne: National Health and Medical Research Council.
- Guidelines: Screening, referral and treatment for depression in patients with coronary heart disease A consensus statement from the National Heart Foundation of Australia. *MJA* 198 (9) · 20 May 2013
- Australian Centre for Post-Traumatic Mental Health 2013 Australian Guidelines for the Treatment of Acute Stress Disorder and Posttraumatic Stress Disorder. ACPMH Melbourne Victoria.

- 1
- 2
- 3
- 4 • KHA CARI Guideline: Early chronic kidney disease: Detection, prevention and
- 5 management. *Nephrology* 2013 :340-350
- 6
- 7 • Cancer pain management in adults. Evidence-based clinical practice guidelines adapted for
- 8 use in Australia. Cancer Guidelines Wiki. 2012
- 9
- 10 • South Australian Head and Neck Cancer Pathway 2013 © Department of Health and Ageing,
- 11 Government of South Australia
- 12
- 13 • Cancer Council Australia. Cancer Guidelines Wiki. Clinical practice guidelines for the
- 14 management of adult onset sarcoma. 2014
- 15
- 16 • Snakebite and Spiderbite Clinical Management Guidelines 2013 -Third Edition Agency for
- 17 Clinical Innovation, NSW Health
- 18
- 19 • CNS metastases in women with secondary breast cancer. 2014. Australian Government,
- 20 Cancer Australia
- 21
- 22 • General practice management of type 2 diabetes – 2014–15. Melbourne: The Royal
- 23 Australian College of General Practitioners and Diabetes Australia, 2014.
- 24
- 25 • KHA-CARI Guideline: Peritonitis treatment and prophylaxis *Nephrology* 19 (2014) 69–71
- 26
- 27 • A new blood glucose management algorithm for type 2 diabetes. A position statement of the
- 28 Australian Diabetes Society. *MJA* 201 (11) · 15 December 2014
- 29
- 30 • Royal Australian and New Zealand College of Psychiatrists clinical practice guidelines for the
- 31 treatment of eating disorders *Aust N Z J Psychiatry* 2014; 48: 977
- 32
- 33 • Clinical Practice Guidelines: Burn Patient Management Agency for Clinical Innovation 2014
- 34
- 35 • Motor Accidents Authority: *Guidelines for the management of acute whiplash-associated*
- 36 *disorders – for health professionals*. Sydney: third edition 2014.
- 37
- 38
- 39
- 40
- 41
- 42
- 43
- 44
- 45
- 46
- 47
- 48
- 49
- 50
- 51
- 52
- 53
- 54
- 55
- 56
- 57
- 58
- 59
- 60
