# Supplementary material for: Undisclosed financial ties between guideline writers and pharmaceutical companies: a cross-sectional study across 10 disease categories
Source: PubMed Central journal article supplement — BMJ Open. 2019 Feb 5;9(2):e025864. doi: 10.1136/bmjopen-2018-025864 (PMC6377504; doi:10.1136/bmjopen-2018-025864), 2019-02-05
Supplement: bmjopen-2018-025864supp002.pdf [file bmjopen-2018-025864supp002.pdf]

## List of Guidelines

- Agency for Clinical Innovation, NSW Health. Evidence-based review for patients undergoing elective hip and knee replacement. *ANZ J Surg* 84 (2014) 17–24
- Osteoporosis Australia Building healthy bones throughout life: an evidence-informed strategy to prevent osteoporosis in Australia *MJA Open*, 2 Suppl 1, 4 February 2013
- 2013. Clinical Practice Guidelines for the Management of Rotator Cuff Syndrome in the Workplace. The University of New South Wales.
- 2012 Clinical Practice Guidelines for the acute treatment of infants and children with asthma. (NSW Health)
- National Asthma Council Australia. *Asthma and the Over 65s- An information paper for health professionals*. Melbourne, National Asthma Council Australia, 2013.
- National Asthma Council Australia. *Asthma and Healthy Living. An information paper for health professionals*. Melbourne, National Asthma Council Australia, 2013.
- Australian Asthma Handbook Version 1, 2014 (National Asthma Council of Australia)
- Chronic Kidney Disease Management in General Practice. 2<sup>nd</sup> Ed 2012 Kidney Health Australia
- National Vascular Disease Prevention Alliance. Guidelines for the management of absolute cardiovascular disease risk. 2012.
- Australian Wound Management Association. Pan Pacific Clinical Practice Guideline for the Prevention and Management of Pressure Injury. Cambridge Media Osborne Park, WA: 2012.
- National Heart Foundation of Australia and the Cardiac Society of Australia and New Zealand. Reducing risk in heart disease: an expert guide to clinical practice for secondary prevention of coronary heart disease. Melbourne: National Heart Foundation of Australia, 2012.
- PERI-OPERATIVE DIABETES MANAGEMENT GUIDELINES AUSTRALIAN DIABETES SOCIETY July 2012
- Position Paper on Hereditary Angioedema Australasian Society of Clinical Immunology and Allergy 2012
- Australian and New Zealand Society for Geriatric Medicine. Position Statement 13. Delirium in Older People Revised 2012
- National Health and Medical Research Council (2012). *Clinical Practice Points on the diagnosis, assessment and management of Attention Deficit Hyperactivity Disorder in children and adolescents*. Commonwealth of Australia.
- Baker IDI Heart and Diabetes Institute. Type 2 diabetes in young Indigenous Australians in rural and remote areas: diagnosis, screening, management and prevention *MJA* 197 (1), 2 July 2012
- Endometriosis and Infertility – a consensus statement from ACCEPT (Australasian CREI Consensus Expert Panel on Trial evidence). *Australian and New Zealand Journal of Obstetrics and Gynaecology* 2012; 52: 513–522
- National Health and Medical Research Council. *Clinical Practice Guideline for the Management of Borderline Personality Disorder*. Melbourne: National Health and Medical Research Council; 2012.
- National Health and Medical Research Council (2013) Clinical practice guidelines for the management of overweight and obesity in adults, adolescents and children in Australia. Melbourne: National Health and Medical Research Council.
- Guidelines: Screening, referral and treatment for depression in patients with coronary heart disease A consensus statement from the National Heart Foundation of Australia. *MJA* 198 (9) · 20 May 2013
- Australian Centre for Post-Traumatic Mental Health 2013 Australian Guidelines for the Treatment of Acute Stress Disorder and Posttraumatic Stress Disorder. ACPMH Melbourne Victoria.

- KHA CARI Guideline: Early chronic kidney disease: Detection, prevention and management. *Nephrology* 2013 :340-350
- Cancer pain management in adults. Evidence-based clinical practice guidelines adapted for use in Australia. Cancer Guidelines Wiki. 2012
- South Australian Head and Neck Cancer Pathway 2013 © Department of Health and Ageing, Government of South Australia
- Cancer Council Australia. Cancer Guidelines Wiki. Clinical practice guidelines for the management of adult onset sarcoma. 2014
- Snakebite and Spiderbite Clinical Management Guidelines 2013 -Third Edition Agency for Clinical Innovation, NSW Health
- CNS metastases in women with secondary breast cancer. 2014. Australian Government, Cancer Australia
- General practice management of type 2 diabetes – 2014–15. Melbourne: The Royal Australian College of General Practitioners and Diabetes Australia, 2014.
- KHA-CARI Guideline: Peritonitis treatment and prophylaxis *Nephrology* 19 (2014) 69–71
- A new blood glucose management algorithm for type 2 diabetes. A position statement of the Australian Diabetes Society. *MJA* 201 (11) · 15 December 2014
- Royal Australian and New Zealand College of Psychiatrists clinical practice guidelines for the treatment of eating disorders *Aust N Z J Psychiatry* 2014; 48: 977
- Clinical Practice Guidelines: Burn Patient Management Agency for Clinical Innovation 2014
- Motor Accidents Authority: *Guidelines for the management of acute whiplash-associated disorders – for health professionals*. Sydney: third edition 2014.
